# Supplementary material for: Higher-Order Model Checking of Effect-Handling Programs with Answer-Type Modification
Source: Atypon-hosted journal article supplement (doi:10.1145/3689805), 2024-10-08
Supplement: supplementary_material.pdf [file supplementary_material.pdf]

# Supplementary Material for “Higher-Order Model Checking of Effect-Handling Programs with Answer-Type Modification”

Taro Sekiyama

August 26, 2024

## Contents

|          |                                                                                             |           |
|----------|---------------------------------------------------------------------------------------------|-----------|
| <b>1</b> | <b>Outline</b>                                                                              | <b>2</b>  |
| <b>2</b> | <b>Definition</b>                                                                           | <b>2</b>  |
| 2.1      | Trees                                                                                       | 2         |
| 2.2      | HEPCF <sup>ATM</sup> : PCF with Answer-Type Modification for Algebraic Effects and Handlers | 3         |
| 2.2.1    | Syntax                                                                                      | 3         |
| 2.2.2    | Semantics                                                                                   | 3         |
| 2.2.3    | Type System                                                                                 | 4         |
| 2.2.4    | Effect Trees                                                                                | 4         |
| 2.3      | EPCF: PCF with Algebraic Effects                                                            | 6         |
| 2.3.1    | Syntax                                                                                      | 6         |
| 2.3.2    | Semantics                                                                                   | 6         |
| 2.3.3    | Type System                                                                                 | 6         |
| 2.3.4    | Effect Trees                                                                                | 6         |
| 2.4      | CPS Transformation from HEPCF <sup>ATM</sup> to EPCF                                        | 8         |
| <b>3</b> | <b>Proofs</b>                                                                               | <b>10</b> |
| 3.1      | Type Soundness of HEPCF <sup>ATM</sup>                                                      | 10        |
| 3.2      | Type Soundness of EPCF                                                                      | 13        |
| 3.3      | Type Preservation                                                                           | 16        |
| 3.4      | Semantics Preservation                                                                      | 19        |

## List of Theorems

|    |                                                                 |   |
|----|-----------------------------------------------------------------|---|
| 1  | Definition (Tree Constructor Signatures)                        | 2 |
| 2  | Definition (Finitely Branching Infinite Trees)                  | 2 |
| 1  | Convention                                                      | 3 |
| 3  | Definition (Free variables and substitution)                    | 3 |
| 1  | Assumption                                                      | 3 |
| 4  | Definition (Top-Level Operation Signatures)                     | 3 |
| 5  | Definition (Ground Types)                                       | 3 |
| 6  | Definition (Semantics)                                          | 3 |
| 7  | Definition (Multi-step evaluation)                              | 3 |
| 8  | Definition (Infinite Evaluation)                                | 4 |
| 9  | Definition (Nonreducible terms)                                 | 4 |
| 10 | Definition (Domains of Typing Contexts)                         | 4 |
| 11 | Definition (Typing Contexts as Functions)                       | 4 |
| 12 | Definition (Typing)                                             | 4 |
| 13 | Definition (Effect Trees for HEPCF <sup>ATM</sup> Computations) | 4 |

|    |                                                                                                       |    |
|----|-------------------------------------------------------------------------------------------------------|----|
| 14 | Definition (Semantics)                                                                                | 6  |
| 15 | Definition (Multi-step evaluation)                                                                    | 6  |
| 16 | Definition (Infinite Evaluation)                                                                      | 6  |
| 17 | Definition (Nonreducible terms)                                                                       | 6  |
| 18 | Definition (Typing)                                                                                   | 6  |
| 19 | Definition (Effect Trees for EPCF Computations)                                                       | 6  |
| 20 | Definition (CPS Transformation of Types, Values, and Terms)                                           | 8  |
| 21 | Definition (CPS Transformation of Effect Trees)                                                       | 8  |
| 1  | Lemma (Weakening)                                                                                     | 10 |
| 2  | Lemma (Value Substitution)                                                                            | 10 |
| 3  | Lemma (Canonical Forms)                                                                               | 10 |
| 4  | Lemma (Progress)                                                                                      | 10 |
| 5  | Lemma (Subject Reduction)                                                                             | 11 |
| 6  | Lemma (Weakening)                                                                                     | 13 |
| 7  | Lemma (Value Substitution)                                                                            | 13 |
| 8  | Lemma (Canonical Forms)                                                                               | 13 |
| 9  | Lemma (Progress)                                                                                      | 14 |
| 10 | Lemma (Subject Reduction)                                                                             | 14 |
| 22 | Definition (Pre-Order on Typing Contexts)                                                             | 16 |
| 23 | Definition (Typing of Effect Handlers)                                                                | 16 |
| 11 | Lemma (Type Preservation of the CPS Transformation)                                                   | 16 |
| 12 | Lemma (Substitution is a Homomorphism)                                                                | 19 |
| 13 | Lemma (Handler and Continuation Substitution)                                                         | 21 |
| 14 | Lemma (Simulation up to Reduction)                                                                    | 23 |
| 15 | Lemma (Evaluation in $\text{HEPCF}^{\text{ATM}}$ is Deterministic)                                    | 28 |
| 16 | Lemma (Well-Definedness of $\text{HEPCF}^{\text{ATM}}$ Effect Trees)                                  | 28 |
| 17 | Lemma (Evaluation in EPCF is Deterministic)                                                           | 28 |
| 18 | Lemma (Well-Definedness of EPCF Effect Trees)                                                         | 28 |
| 19 | Lemma (Evaluation Preserves Effect Trees in EPCF)                                                     | 29 |
| 20 | Lemma (Correspondence between Effect Trees of CPS-Transformed Terms and CPS-Transformed Effect Trees) | 29 |
| 1  | Theorem (Preservation of Effect Trees)                                                                | 31 |

## 1 Outline

This is the supplementary material of the paper titled “Higher-Order Model Checking of Effect-Handling Programs with Answer-Type Modification” published at OOPSLA’24, including all the definitions, lemmas, theorems, and proofs mentioned in the paper.

## 2 Definition

### 2.1 Trees

**Definition 1** (Tree Constructor Signatures). *A tree constructor signature  $S$  is a map from tree constructors, ranged over by  $s$ , to natural numbers that represent the arities of the constructors. We write  $\text{ar}_S(s)$  for the arity of  $s$  assigned by  $S$ .*

**Definition 2** (Finitely Branching Infinite Trees). *The set  $\mathbf{Tree}_S$  of finitely branching (possibly) infinite trees generated by a tree constructor signature  $S$  is defined coinductively by the following grammar (where  $s$  is in the domain of  $S$ ):*

$$t ::= \perp \mid s(t_1, \dots, t_{\text{ar}_S(s)}).$$

Evaluation rules  $\boxed{M_1 \longrightarrow M_2}$

|                                                       |                                                                                                                   |                                                          |                                          |             |
|-------------------------------------------------------|-------------------------------------------------------------------------------------------------------------------|----------------------------------------------------------|------------------------------------------|-------------|
| $(\lambda x. M_1) V_2$                                | $\longrightarrow$                                                                                                 | $M_1[V_2/x]$                                             |                                          | HE_BETA     |
| $(\text{fix } x. V_1) V_2$                            | $\longrightarrow$                                                                                                 | $V_1[\text{fix } x. V_1/x] V_2$                          |                                          | HE_FIX      |
| $\text{case}(i; M_1, \dots, M_n)$                     | $\longrightarrow$                                                                                                 | $M_i$                                                    | (if $0 < i \leq n$ )                     | HE_CASE     |
| $\text{let } x = \text{return } V_1 \text{ in } M_2$  | $\longrightarrow$                                                                                                 | $M_2[V_1/x]$                                             |                                          | HE_LETV     |
| $\text{let } x = \sigma(V_1; y. M_1) \text{ in } M_2$ | $\longrightarrow$                                                                                                 | $\sigma(V_1; y. \text{let } x = M_1 \text{ in } M_2)$    | (if $y \notin \text{fv}(M_2)$ )          | HE_LETOP    |
| $\text{with } H \text{ handle return } V$             | $\longrightarrow$                                                                                                 | $M[V/x]$                                                 | (if $\text{return } x \mapsto M \in H$ ) | HE_HANDLEV  |
| $\text{with } H \text{ handle } \sigma(V; y. M)$      | $\longrightarrow$                                                                                                 | $M'[V/x][\lambda y. \text{with } H \text{ handle } M/k]$ | (if $\sigma(x; k) \mapsto M' \in H$ )    | HE_HANDLEOP |
| <hr style="border: 0.5px solid black;"/>              |                                                                                                                   |                                                          |                                          |             |
| $M_1 \longrightarrow M_1'$                            | $\frac{}{\text{let } x = M_1 \text{ in } M_2 \longrightarrow \text{let } x = M_1' \text{ in } M_2}$               |                                                          | HE_LETE                                  |             |
|                                                       | $\frac{M \longrightarrow M'}{\text{with } H \text{ handle } M \longrightarrow \text{with } H \text{ handle } M'}$ |                                                          | HE_HANDLEE                               |             |

Figure 1: Semantics.

## 2.2 HEPCF<sup>ATM</sup>: PCF with Answer-Type Modification for Algebraic Effects and Handlers

### 2.2.1 Syntax

|                             |                                                                                                                                                                                |                   |          |
|-----------------------------|--------------------------------------------------------------------------------------------------------------------------------------------------------------------------------|-------------------|----------|
| <b>Variables</b>            | $x, y, z, f, h, k$                                                                                                                                                             | <b>Operations</b> | $\sigma$ |
| <b>Base types</b>           | $B ::= \text{bool} \mid \text{unit} \mid \dots$                                                                                                                                |                   |          |
| <b>Enum types</b>           | $E ::= 1 \mid 2 \mid \dots$                                                                                                                                                    |                   |          |
| <b>Value types</b>          | $T ::= B \mid E \mid T \rightarrow C$                                                                                                                                          |                   |          |
| <b>Computation types</b>    | $C ::= \Sigma \triangleright T / A^{\text{ini}} \Rightarrow A^{\text{fin}}$                                                                                                    |                   |          |
| <b>Operation signatures</b> | $\Sigma ::= \{\sigma_i : T_i^{\text{par}} \rightsquigarrow T_i^{\text{ari}} / A_i^{\text{ini}} \Rightarrow A_i^{\text{fin}}\}^{1 \leq i \leq n}$                               |                   |          |
| <b>Answer types</b>         | $A ::= T \mid C$                                                                                                                                                               |                   |          |
| <b>Base constants</b>       | $c ::= \text{true} \mid \text{false} \mid () \mid \dots$                                                                                                                       |                   |          |
| <b>Enum constants</b>       | $\varepsilon ::= \underline{1} \mid \underline{2} \mid \dots$                                                                                                                  |                   |          |
| <b>Values</b>               | $V ::= x \mid c \mid \varepsilon \mid \lambda x. M \mid \text{fix } x. V$                                                                                                      |                   |          |
| <b>Terms</b>                | $M ::= \text{return } V \mid \text{let } x = M_1 \text{ in } M_2 \mid V_1 V_2 \mid \text{case}(V; M_1, \dots, M_n) \mid \sigma(V; x. M) \mid \text{with } H \text{ handle } M$ |                   |          |
| <b>Handlers</b>             | $H ::= \{\text{return } x \mapsto M\} \uplus \{\sigma_i(x_i; k_i) \mapsto M_i\}^{1 \leq i \leq n}$                                                                             |                   |          |
| <b>Typing contexts</b>      | $\Gamma ::= \emptyset \mid \Gamma, x : T$                                                                                                                                      |                   |          |

**Convention 1.** We write  $\Gamma_1, \Gamma_2$  for the concatenation of  $\Gamma_1$  and  $\Gamma_2$ . For a computation type  $C = \Sigma \triangleright T / A^{\text{ini}} \Rightarrow A^{\text{fin}}$ , we write  $C.\Sigma$  for the operation signature  $\Sigma$ .

**Definition 3** (Free variables and substitution). The set  $\text{fv}(M)$  of free variables in a term  $M$  is defined in a standard manner. Value substitution  $M[V/x]$  and  $V'[V/x]$  of  $V$  for  $x$  in  $M$  and  $V'$ , respectively, are defined in a capture-avoiding manner as usual.

**Assumption 1.** We assume a function  $ty$  that assigns a base type to every constant  $c$ .

**Definition 4** (Top-Level Operation Signatures). An operation signature  $\Sigma$  is top-level if, for any  $\sigma : T^{\text{par}} \rightsquigarrow T^{\text{ari}} / A^{\text{ini}} \Rightarrow A^{\text{fin}} \in \Sigma$ ,  $T^{\text{par}} = B$  for some  $B$ ,  $T^{\text{ari}} = E$  for some  $E$ , and  $A^{\text{ini}} = A^{\text{fin}} = T$  for some  $T$ .

**Definition 5** (Ground Types). A type  $T$  is ground if and only if  $T = B$  for some  $B$  or  $T = E$  for some  $E$ .

### 2.2.2 Semantics

**Definition 6** (Semantics). The evaluation relation  $M_1 \longrightarrow M_2$  is the smallest relations satisfying the rules in Figure 1.

**Definition 7** (Multi-step evaluation). We write  $M \longrightarrow^n M'$  if and only if there exist some terms  $M_0, \dots, M_n$  such that:  $M = M_0$ ;  $\forall i < n. M_i \longrightarrow M_{i+1}$ ; and  $M_n = M'$ . We write  $M \longrightarrow^* M'$  if and only if  $M \longrightarrow^n M'$  for some  $n$ .

Typing rules  $\boxed{\Gamma \vdash V : T}$   $\boxed{\Gamma \vdash M : C}$

$$\begin{array}{c}
\frac{}{\Gamma \vdash x : \Gamma(x)} \text{HT\_VAR} \qquad \frac{}{\Gamma \vdash c : \text{ty}(c)} \text{HT\_CONST} \qquad \frac{0 < i \leq n}{\Gamma \vdash \underline{i} : n} \text{HT\_ECONST} \\
\frac{\Gamma, x : T \vdash M : C}{\Gamma \vdash \lambda x.M : T \rightarrow C} \text{HT\_ABS} \qquad \frac{\Gamma, x : T \rightarrow C \vdash V : T \rightarrow C}{\Gamma \vdash \text{fix } x.V : T \rightarrow C} \text{HT\_FIX} \\
\frac{\Gamma \vdash V : T}{\Gamma \vdash \text{return } V : \Sigma \triangleright T / A \Rightarrow A} \text{HT\_RETURN} \\
\frac{\Gamma \vdash M_1 : \Sigma \triangleright T_1 / A \Rightarrow A_1 \quad \Gamma, x : T_1 \vdash M_2 : \Sigma \triangleright T_2 / A_2 \Rightarrow A}{\Gamma \vdash \text{let } x = M_1 \text{ in } M_2 : \Sigma \triangleright T_2 / A_2 \Rightarrow A} \text{HT\_LET} \\
\frac{\Gamma \vdash V_1 : T \rightarrow C \quad \Gamma \vdash V_2 : T}{\Gamma \vdash V_1 V_2 : C} \text{HT\_APP} \qquad \frac{\Gamma \vdash V : n \quad \forall i \in [1, n]. \Gamma \vdash M_i : C}{\Gamma \vdash \text{case}(V; M_1, \dots, M_n) : C} \text{HT\_CASE} \\
\frac{\Sigma \ni \sigma : T^{\text{par}} \rightsquigarrow T^{\text{ari}} / A^{\text{ini}} \Rightarrow A^{\text{fin}} \quad \Gamma \vdash V : T^{\text{par}} \quad \Gamma, x : T^{\text{ari}} \vdash M : \Sigma \triangleright T / A \Rightarrow A^{\text{ini}}}{\Gamma \vdash \sigma(V; x.M) : \Sigma \triangleright T / A \Rightarrow A^{\text{fin}}} \text{HT\_OP} \\
\frac{H = \{\text{return } x \mapsto M'\} \uplus \{\sigma_i(x_i; k_i) \mapsto M_i\}^{1 \leq i \leq n} \quad \Sigma = \{\sigma_i : T_i^{\text{par}} \rightsquigarrow T_i^{\text{ari}} / C_i^{\text{ini}} \Rightarrow C_i^{\text{fin}}\}^{1 \leq i \leq n}}{\Gamma \vdash M : \Sigma \triangleright T / C^{\text{ini}} \Rightarrow C^{\text{fin}} \quad \Gamma, x : T \vdash M' : C^{\text{ini}} \quad \forall i \in [1, n]. \Gamma, x_i : T_i^{\text{par}}, k_i : T_i^{\text{ari}} \rightarrow C_i^{\text{ini}} \vdash M_i : C_i^{\text{fin}}} \text{HT\_HANDLE} \\
\Gamma \vdash \text{with } H \text{ handle } M : C^{\text{fin}}
\end{array}$$

Figure 2: Type system.

**Definition 8** (Infinite Evaluation). We write  $M \longrightarrow^\omega$  if and only if, for any natural number  $n$ , there exists some term  $M'$  such that  $M \longrightarrow^n M'$ .

**Definition 9** (Nonreducible terms). We write  $M \not\rightarrow$  if and only if there is no  $M'$  such that  $M \rightarrow M'$ .

### 2.2.3 Type System

**Definition 10** (Domains of Typing Contexts). Given a typing context  $\Gamma$ , its domain  $\text{dom}(\Gamma)$  is defined by induction on  $\Gamma$  as follows.

$$\begin{array}{lcl}
\text{dom}(\emptyset) & \stackrel{\text{def}}{=} & \emptyset \\
\text{dom}(\Gamma, x : T) & \stackrel{\text{def}}{=} & \{x\} \cup \text{dom}(\Gamma)
\end{array}$$

**Definition 11** (Typing Contexts as Functions). We view  $\Gamma$  as a function that maps a variable to a type.  $\Gamma(x) = T$  if and only if  $x : T \in \Gamma$ .

**Definition 12** (Typing). The typing of values (with judgments of the form  $\Gamma \vdash V : T$ ) and terms (with judgments of the form  $\Gamma \vdash M : C$ ) is the smallest relation satisfying the rules in Figure 2.

### 2.2.4 Effect Trees

**Definition 13** (Effect Trees for HEPCF<sup>ATM</sup> Computations). Given an operation signature  $\Sigma$  and a type  $T$ , the tree constructor signature  $S_T^\Sigma$  is defined as follows:

$$S_T^\Sigma \stackrel{\text{def}}{=} \{\sigma : n + 1 \mid \sigma : B \rightsquigarrow n / A^{\text{ini}} \Rightarrow A^{\text{fin}} \in \Sigma\} \cup \{\text{return } V : 0 \mid \emptyset \vdash V : T\} \cup \bigcup_c \{c : 0\}.$$

where, for a tree constructor  $s$  (that is an operation  $\sigma$ , return construct  $\text{return } V$ , or base constant  $c$ ),  $s : n$  denotes the pair  $(s, n)$ , meaning that the arity of  $s$  is  $n$ . Given a term  $M$  such that  $\emptyset \vdash M : \Sigma \triangleright T / A^{\text{ini}} \Rightarrow A^{\text{fin}}$ , the effect tree of  $M$ , denoted by  $\mathbf{ET}(M)$ , is a tree in  $\mathbf{Tree}_{S_T^\Sigma}$  defined by the following (possibly infinite) process:

- if  $M \longrightarrow^\omega$ , then  $\mathbf{ET}(M) = \perp$ ;

- if  $M \longrightarrow^* \text{return } V$ , then  $\mathbf{ET}(M) = \text{return } V$ ; and
- if  $M \longrightarrow^* \sigma(c; x. M')$  and  $\sigma : B \rightsquigarrow \mathbf{n} / A^{\text{ini}} \Rightarrow A^{\text{fin}} \in \Sigma$ , then  $\mathbf{ET}(M) = \sigma(c, \mathbf{ET}(M'[\underline{1}/x]), \dots, \mathbf{ET}(M'[\underline{n}/x]))$ .

Evaluation rules  $\boxed{e_1 \longrightarrow e_2}$

$$\begin{array}{llll}
(\lambda x. e_1) v_2 & \longrightarrow & e_1[v_2/x] & \text{E\_BETA} \\
(\text{fix } x. v_1) v_2 & \longrightarrow & v_1[\text{fix } x. v_1/x] v_2 & \text{E\_FIX} \\
\text{case}(i; e_1, \dots, e_n) & \longrightarrow & e_i & \text{(if } 0 < i \leq n) \text{ E\_CASE} \\
\text{let } x = \text{return } v_1 \text{ in } e_2 & \longrightarrow & e_2[v_1/x] & \text{E\_LETV} \\
\text{let } x = \sigma(v_1; y. e_1) \text{ in } e_2 & \longrightarrow & \sigma(v_1; y. \text{let } x = e_1 \text{ in } e_2) & \text{(if } y \notin \text{fv}(e_2)) \text{ E\_LETOP} \\
\\ 
\frac{e_1 \longrightarrow e'_1}{\text{let } x = e_1 \text{ in } e_2 \longrightarrow \text{let } x = e'_1 \text{ in } e_2} & & & \text{(E\_LETE)}
\end{array}$$

Figure 3: Semantics.

## 2.3 EPCF: PCF with Algebraic Effects

### 2.3.1 Syntax

| Variables                   | $x, y, z, f, h, k$                                                                                                                       | Operations | $\sigma$ |
|-----------------------------|------------------------------------------------------------------------------------------------------------------------------------------|------------|----------|
| <b>Base types</b>           | $B ::= \text{bool} \mid \text{unit} \mid \dots$                                                                                          |            |          |
| <b>Enum types</b>           | $E ::= 1 \mid 2 \mid \dots$                                                                                                              |            |          |
| <b>Types</b>                | $\tau ::= B \mid E \mid \tau_1 \rightarrow \tau_2$                                                                                       |            |          |
| <b>Operation signatures</b> | $\Xi ::= \{\sigma_i : B_i \rightsquigarrow E_i\}^{1 \leq i \leq n}$                                                                      |            |          |
| <b>Base constants</b>       | $c ::= \text{true} \mid \text{false} \mid () \mid \dots$                                                                                 |            |          |
| <b>Enum constants</b>       | $\varepsilon ::= \underline{1} \mid \underline{2} \mid \dots$                                                                            |            |          |
| <b>Values</b>               | $v ::= x \mid c \mid \varepsilon \mid \lambda x. e \mid \text{fix } x. v$                                                                |            |          |
| <b>Terms</b>                | $e ::= \text{return } v \mid \text{let } x = e_1 \text{ in } e_2 \mid v_1 v_2 \mid \text{case}(v; e_1, \dots, e_n) \mid \sigma(v; x. e)$ |            |          |
| <b>Typing contexts</b>      | $\Delta ::= \emptyset \mid \Delta, x : \tau$                                                                                             |            |          |

For the syntactic operations common in  $\text{HEPCF}^{\text{ATM}}$  and EPCF, we use the same notation (e.g.,  $\text{fv}(e)$  is the set of free variables in  $e$  and  $e[v/x]$  is the term obtained by substituting  $v$  for  $x$  in  $e$ ).

### 2.3.2 Semantics

**Definition 14** (Semantics). *The evaluation relation  $e_1 \longrightarrow e_2$  is the smallest relations satisfying the rules in Figure 3.*

**Definition 15** (Multi-step evaluation). *We write  $e \longrightarrow^n e'$  if and only if there exist some terms  $e_0, \dots, e_n$  such that:  $e = e_0$ ;  $\forall i < n. e_i \longrightarrow e_{i+1}$ ; and  $e_n = e'$ . We write  $e \longrightarrow^* e'$  if and only if  $e \longrightarrow^n e'$  for some  $n$ , and  $e \longrightarrow^+ e'$  if and only if  $e \longrightarrow^n e'$  for some  $n > 0$ .*

**Definition 16** (Infinite Evaluation). *We write  $e \longrightarrow^\omega$  if and only if, for any natural number  $n$ , there exists some term  $e'$  such that  $e \longrightarrow^n e'$ .*

**Definition 17** (Nonreducible terms). *We write  $e \not\rightarrow$  if and only if there is no  $e'$  such that  $e \longrightarrow e'$ .*

### 2.3.3 Type System

**Definition 18** (Typing). *Fix an operation signature  $\Xi$ . Then, the typing of values (with judgments of the form  $\Xi \parallel \Delta \vdash v : \tau$ ) and terms (with judgments of the form  $\Xi \parallel \Delta \vdash e : \tau$ ) is the smallest relation satisfying the rules in Figure 4.*

### 2.3.4 Effect Trees

**Definition 19** (Effect Trees for EPCF Computations). *Given an operation signature  $\Xi$  and a type  $\tau$ , the tree constructor signature  $S_\tau^\Xi$  is defined as follows:*

$$S_\tau^\Xi \stackrel{\text{def}}{=} \{\sigma : n + 1 \mid \sigma : B \rightsquigarrow n \in \Xi\} \cup \{\text{return } v : 0 \mid \Xi \parallel \emptyset \vdash v : \tau\} \cup \bigcup_c \{c : 0\}.$$

Typing rules  $\boxed{\Xi \parallel \Delta \vdash v : \tau} \quad \boxed{\Xi \parallel \Delta \vdash e : \tau}$

$$\begin{array}{c}
\frac{}{\Xi \parallel \Delta \vdash x : \Delta(x)} \text{T\_VAR} \qquad \frac{}{\Xi \parallel \Delta \vdash c : ty(c)} \text{T\_CONST} \qquad \frac{0 < i \leq n}{\Xi \parallel \Delta \vdash i : n} \text{T\_ECONST} \\
\frac{\Xi \parallel \Delta, x : \tau_1 \vdash e : \tau_2}{\Xi \parallel \Delta \vdash \lambda x. e : \tau_1 \rightarrow \tau_2} \text{T\_ABS} \qquad \frac{\Xi \parallel \Delta, x : \tau_1 \rightarrow \tau_2 \vdash v : \tau_1 \rightarrow \tau_2}{\Xi \parallel \Delta \vdash \text{fix } x. v : \tau_1 \rightarrow \tau_2} \text{T\_FIX} \\
\frac{\Xi \parallel \Delta \vdash v : \tau}{\Xi \parallel \Delta \vdash \text{return } v : \tau} \text{T\_RETURN} \qquad \frac{\Xi \parallel \Delta \vdash e_1 : \tau_1 \quad \Xi \parallel \Delta, x : \tau_1 \vdash e_2 : \tau_2}{\Xi \parallel \Delta \vdash \text{let } x = e_1 \text{ in } e_2 : \tau_2} \text{T\_LET} \\
\frac{\Xi \parallel \Delta \vdash v_1 : \tau_1 \rightarrow \tau_2 \quad \Xi \parallel \Delta \vdash v_2 : \tau_1}{\Xi \parallel \Delta \vdash v_1 v_2 : \tau_2} \text{T\_APP} \qquad \frac{\Xi \parallel \Delta \vdash v : n \quad \forall i \in [1, n]. \Xi \parallel \Delta \vdash e_i : \tau}{\Xi \parallel \Delta \vdash \text{case}(v; e_1, \dots, e_n) : \tau} \text{T\_CASE} \\
\frac{\Xi \ni \sigma : B \rightsquigarrow E \quad \Xi \parallel \Delta \vdash v : B \quad \Xi \parallel \Delta, x : E \vdash e : \tau}{\Xi \parallel \Delta \vdash \sigma(v; x. e) : \tau} \text{T\_OP}
\end{array}$$

Figure 4: Type system.

Given a term  $e$  such that  $\Xi \parallel \emptyset \vdash e : \tau$ , the effect tree of  $e$ , denoted by  $\mathbf{ET}(e)$ , is a tree in  $\mathbf{Tree}_{S_{\Xi}^{\tau}}$  defined by the following (possibly infinite) process:

- if  $e \rightarrow^{\omega}$ , then  $\mathbf{ET}(e) = \perp$ ;
- if  $e \rightarrow^* \text{return } v$ , then  $\mathbf{ET}(e) = \text{return } v$ ; and
- if  $e \rightarrow^* \sigma(c; x. e')$  and  $\sigma : B \rightsquigarrow n \in \Xi$ , then  $\mathbf{ET}(e) = \sigma(c, \mathbf{ET}(e'[\underline{1}/x]), \dots, \mathbf{ET}(e'[\underline{n}/x]))$ .

## 2.4 CPS Transformation from HEPCF<sup>ATM</sup> to EPCF

Our CPS transformation is defined using the following shorthand:

- A sequence of entities  $a_1, \dots, a_n$  is abbreviated to  $\bar{a}$ , and its length is denoted by  $|\bar{a}|$ . Given  $\bar{a}$ , we write  $a_i$  to designate the  $i$ -th element of the sequence  $\bar{a}$ .
- Given a variable sequence  $\bar{x} = x_1, \dots, x_n$ , we write  $\lambda\bar{x}.e$  for the EPCF term  $\lambda x_1.\text{return } \lambda x_2.\dots \text{return } \lambda x_n.e$ .
- Given a term  $e$  and values  $v_1, \dots, v_n$  ( $n > 0$ ), we write  $e v_1 \dots v_n$  for the EPCF term  $\text{let } x_0 = e \text{ in let } x_1 = x_0 v_1 \text{ in let } x_2 = x_1 v_2 \text{ in } \dots \text{let } x_{n-1} = x_{n-2} v_{n-1} \text{ in } x_{n-1} v_n$  where the variables  $x_0, x_1, \dots, x_{n-1}$  are assumed to be fresh.

We also assume that the set of all the operations is totally ordered.

**Definition 20** (CPS Transformation of Types, Values, and Terms). *CPS Transformation*  $\llbracket - \rrbracket$  from HEPCF<sup>ATM</sup> to EPCF is defined in Figure 5, mapping

- value types  $T$  to EPCF types  $\llbracket T \rrbracket$ ,
- computation types  $C$  to EPCF types  $\llbracket C \rrbracket$ ,
- operation signatures  $\Sigma$  to functions that, given a EPCF type  $\tau$ , return the EPCF type  $\llbracket \Sigma \rrbracket[\tau]$ ,
- values  $V$  to EPCF values  $\llbracket V \rrbracket$ ,
- terms  $M$  to EPCF values  $\llbracket M \rrbracket$ , and
- terms  $M$  to EPCF terms  $\llbracket M \rrbracket[\bar{v}^{\bar{h}} \mid v^k]$  given values  $\bar{v}^{\bar{h}}$  and  $v^k$ .

The definition of  $\llbracket M \rrbracket$  and  $\llbracket M \rrbracket[\bar{v}^{\bar{h}} \mid v^k]$  assumes that the HEPCF<sup>ATM</sup> term  $M$  to be CPS-transformed is well typed. In general, given an HEPCF<sup>ATM</sup> term  $M$  typed at a computation type with an operation signature  $\Sigma$ , the CPS-transformation result  $\llbracket M \rrbracket$  takes the form  $\lambda\bar{h}.k.e$  for some variables  $\bar{h}, k$  and EPCF term  $e$  such that  $|\bar{h}| = |\Sigma|$ . Similarly,  $\llbracket M \rrbracket[\bar{v}^{\bar{h}} \mid v^k]$  assumes that  $|\Sigma|$  values  $\bar{v}^{\bar{h}}$  are given. The transformation of operation calls assumes that a called operation  $\sigma_i$  is the  $i$ -th operation in  $\Sigma$  (under the order of operations). We also write  $\llbracket \Gamma \rrbracket$  for the EPCF typing context obtained by CPS-transforming the types of all the bindings of typing context  $\Gamma$ .

**Definition 21** (CPS Transformation of Effect Trees). Given an effect tree  $\mathbf{ET}(M)$  in HEPCF<sup>ATM</sup> and a value  $v$ , the tree  $\llbracket \mathbf{ET}(M) \rrbracket[v]$  is defined coinductively as follows:

$$\begin{aligned} \llbracket \perp \rrbracket[v] &\stackrel{\text{def}}{=} \perp \\ \llbracket \text{return } V \rrbracket[v] &\stackrel{\text{def}}{=} \mathbf{ET}(v \llbracket V \rrbracket) \\ \llbracket \sigma(c, \mathbf{ET}(M_1), \dots, \mathbf{ET}(M_n)) \rrbracket[v] &\stackrel{\text{def}}{=} \sigma(c, \llbracket \mathbf{ET}(M_1) \rrbracket[v], \dots, \llbracket \mathbf{ET}(M_n) \rrbracket[v]) \end{aligned}$$



$\llbracket T \rrbracket$  for value types

$$\begin{aligned} \llbracket B \rrbracket &\stackrel{\text{def}}{=} B \\ \llbracket E \rrbracket &\stackrel{\text{def}}{=} E \\ \llbracket T \rightarrow C \rrbracket &\stackrel{\text{def}}{=} \llbracket T \rrbracket \rightarrow \llbracket C \rrbracket \end{aligned}$$

$\llbracket C \rrbracket$  for computation types

$$\llbracket \Sigma \triangleright T / A^{\text{ini}} \Rightarrow A^{\text{fin}} \rrbracket \stackrel{\text{def}}{=} \llbracket \Sigma \rrbracket (\llbracket T \rrbracket \rightarrow \llbracket A^{\text{ini}} \rrbracket) \rightarrow \llbracket A^{\text{fin}} \rrbracket$$

$\llbracket \Sigma \rrbracket [\tau]$  for operation signatures

$$\begin{aligned} \llbracket \emptyset \rrbracket [\tau] &\stackrel{\text{def}}{=} \tau \\ \llbracket \Sigma \uplus \{ \sigma : T^{\text{par}} \rightsquigarrow T^{\text{ari}} / A^{\text{ini}} \Rightarrow A^{\text{fin}} \} \rrbracket [\tau] &\stackrel{\text{def}}{=} (\llbracket T^{\text{par}} \rrbracket \rightarrow (\llbracket T^{\text{ari}} \rrbracket \rightarrow \llbracket A^{\text{ini}} \rrbracket) \rightarrow \llbracket A^{\text{fin}} \rrbracket) \rightarrow \llbracket \Sigma \rrbracket [\tau] \\ &\quad (\text{where } \sigma \text{ is lower than any operation in } \Sigma) \end{aligned}$$

$\llbracket V \rrbracket$  for values

$$\begin{aligned} \llbracket x \rrbracket &\stackrel{\text{def}}{=} x \\ \llbracket c \rrbracket &\stackrel{\text{def}}{=} c \\ \llbracket \mathbf{n} \rrbracket &\stackrel{\text{def}}{=} \mathbf{n} \\ \llbracket \lambda x. M \rrbracket &\stackrel{\text{def}}{=} \lambda x. \text{return } \llbracket M \rrbracket \\ \llbracket \text{fix } x. V \rrbracket &\stackrel{\text{def}}{=} \text{fix } x. \llbracket V \rrbracket \end{aligned}$$

$\llbracket M \rrbracket$  for terms

$$\llbracket M \rrbracket \stackrel{\text{def}}{=} \lambda \bar{h}, k. \llbracket M \rrbracket [\bar{h} \mid k]$$

$\llbracket M \rrbracket [\bar{v}^{\text{h}} \mid v^{\text{k}}]$  for terms with handlers and continuations

$$\begin{aligned} \llbracket \text{return } V \rrbracket [\bar{v}^{\text{h}} \mid v^{\text{k}}] &\stackrel{\text{def}}{=} v^{\text{k}} \llbracket V \rrbracket \\ \llbracket \text{let } x = M_1 \text{ in } M_2 \rrbracket [\bar{v}^{\text{h}} \mid v^{\text{k}}] &\stackrel{\text{def}}{=} \llbracket M_1 \rrbracket [\bar{v}^{\text{h}} \mid \lambda x. \llbracket M_2 \rrbracket [\bar{v}^{\text{h}} \mid v^{\text{k}}]] \\ \llbracket V_1 V_2 \rrbracket [\bar{v}^{\text{h}} \mid v^{\text{k}}] &\stackrel{\text{def}}{=} \llbracket V_1 \rrbracket \llbracket V_2 \rrbracket \bar{v}^{\text{h}} v^{\text{k}} \\ \llbracket \text{case}(V; M_1, \dots, M_n) \rrbracket [\bar{v}^{\text{h}} \mid v^{\text{k}}] &\stackrel{\text{def}}{=} \text{case}(\llbracket V \rrbracket; \llbracket M_1 \rrbracket [\bar{v}^{\text{h}} \mid v^{\text{k}}], \dots, \llbracket M_n \rrbracket [\bar{v}^{\text{h}} \mid v^{\text{k}}]) \\ \llbracket \sigma_i(V; x. M) \rrbracket [\bar{v}^{\text{h}} \mid v^{\text{k}}] &\stackrel{\text{def}}{=} v_i^{\text{h}} \llbracket V \rrbracket \lambda x, \bar{h}, k. \llbracket M \rrbracket [\bar{v}^{\text{h}} \mid v^{\text{k}}] \bar{h} k \\ &\quad (\text{if } \sigma_i \text{ is the } i\text{-th operation in } \Sigma \text{ and } \sigma_i : T_i^{\text{par}} \rightsquigarrow T_i^{\text{ari}} / C_i^{\text{ini}} \Rightarrow A_i^{\text{fin}} \in \Sigma \text{ and } |C_i^{\text{ini}}. \Sigma| = |\bar{h}|) \\ \llbracket \sigma_i(V; x. M) \rrbracket [\bar{v}^{\text{h}} \mid v^{\text{k}}] &\stackrel{\text{def}}{=} v_i^{\text{h}} \llbracket V \rrbracket \lambda x. \llbracket M \rrbracket [\bar{v}^{\text{h}} \mid v^{\text{k}}] \\ &\quad (\text{if } \sigma_i \text{ is the } i\text{-th operation in } \Sigma \text{ and } \sigma_i : T_i^{\text{par}} \rightsquigarrow T_i^{\text{ari}} / T_i^{\text{ini}} \Rightarrow A_i^{\text{fin}} \in \Sigma) \\ \llbracket \text{with } H \text{ handle } M \rrbracket [\bar{v}^{\text{h}} \mid v^{\text{k}}] &\stackrel{\text{def}}{=} \llbracket M \rrbracket [\lambda x_1, k_1. \text{return } \llbracket M_1 \rrbracket, \dots, \lambda x_n, k_n. \text{return } \llbracket M_n \rrbracket \mid \lambda x. \text{return } \llbracket M' \rrbracket] \bar{v}^{\text{h}} v^{\text{k}} \\ &\quad (\text{where } H = \{ \text{return } x \mapsto M' \} \uplus \{ \sigma_i(x_i; k_i) \mapsto M_i \}^{1 \leq i \leq n}) \end{aligned}$$

Figure 5: CPS transformation. In the definition of  $\llbracket M \rrbracket$  and  $\llbracket M \rrbracket [\bar{v}^{\text{h}} \mid v^{\text{k}}]$ , we assume that  $M$  is well typed with an operation signature  $\Sigma$ . Furthermore, for sequences  $\bar{h}$  in the definition of  $\llbracket M \rrbracket$  and  $\bar{v}^{\text{h}}$  in  $\llbracket M \rrbracket [\bar{v}^{\text{h}} \mid v^{\text{k}}]$ ,  $|\bar{h}| = |\bar{v}^{\text{h}}| = |\Sigma|$ .

### 3 Proofs

#### 3.1 Type Soundness of HEPCF<sup>ATM</sup>

**Lemma 1** (Weakening). *Assume that  $\text{dom}(\Gamma_2) \cap \text{dom}(\Gamma_1, \Gamma_3)$  is empty.*

- If  $\Gamma_1, \Gamma_3 \vdash V : T$ , then  $\Gamma_1, \Gamma_2, \Gamma_3 \vdash V : T$ .
- If  $\Gamma_1, \Gamma_3 \vdash M : C$ , then  $\Gamma_1, \Gamma_2, \Gamma_3 \vdash M : C$ .

*Proof.* Straightforward by mutual induction on the typing derivations. □

**Lemma 2** (Value Substitution). *Assume that  $\Gamma_1 \vdash V_0 : T_0$ .*

- If  $\Gamma_1, x : T_0, \Gamma_2 \vdash V : T$ , then  $\Gamma_1, \Gamma_2 \vdash V[V_0/x] : T$ .
- If  $\Gamma_1, x : T_0, \Gamma_2 \vdash M : C$ , then  $\Gamma_1, \Gamma_2 \vdash M[V_0/x] : C$ .

*Proof.* Straightforward by mutual induction on the typing derivations. The case for (HT\_VAR) rests on Lemma 1. □

**Lemma 3** (Canonical Forms). *Assume that  $\emptyset \vdash V : T$ .*

- If  $T = B$ , then  $V = c$  for some  $c$  such that  $\text{ty}(c) = B$ .
- If  $T = n$ , then  $V = \underline{i}$  for some  $i$  such that  $0 < i \leq n$ .
- If  $T = T' \rightarrow C'$ , then  $V = \lambda x.M$  for some  $x$  and  $M$ , or  $V = \text{fix } x.V'$  for some  $x$  and  $V'$ .

*Proof.* Straightforward by case analysis on the typing derivation. Note that, for any  $c$ ,  $\text{ty}(c) = B$  for some  $B$  by Assumption 1. □

**Lemma 4** (Progress). *If  $\emptyset \vdash M : C$ , then one of the following holds:*

- $M = \text{return } V$  for some  $V$ ;
- $M = \sigma(V; x.M')$  for some  $\sigma$ ,  $V$ ,  $x$ , and  $M'$ ; or
- $M \longrightarrow M'$  for some  $M'$ .

*Proof.* By induction on the typing derivation applied last to derive  $\emptyset \vdash M : C$ .

Case (HT\_RETURN): Obvious.

Case (HT\_LET): We are given

$$\frac{\emptyset \vdash M_1 : \Sigma \triangleright T_1 / A \Rightarrow A_1 \quad x : T_1 \vdash M_2 : \Sigma \triangleright T_2 / A_2 \Rightarrow A}{\emptyset \vdash \text{let } x = M_1 \text{ in } M_2 : \Sigma \triangleright T_2 / A_2 \Rightarrow A_1}$$

for some  $x$ ,  $M_1$ ,  $M_2$ ,  $\Sigma$ ,  $T_1$ ,  $T_2$ ,  $A_1$ ,  $A_2$ , and  $A$  such that  $M = (\text{let } x = M_1 \text{ in } M_2)$  and  $C = \Sigma \triangleright T_2 / A_2 \Rightarrow A_1$ . By case analysis on the result of the IH on  $\emptyset \vdash M_1 : \Sigma \triangleright T_1 / A \Rightarrow A_1$ .

Case  $\exists V_1. M_1 = \text{return } V_1$ : By (HE\_LETV).

Case  $\exists \sigma, V_1, y, M'_1. M_1 = \sigma(V_1; y. M'_1)$ : By (HE\_LETOP).

Case  $\exists M'_1. M_1 \longrightarrow M'_1$ : By (HE\_LETE).

Case (HT\_APP): We are given

$$\frac{\emptyset \vdash V_1 : T \rightarrow C \quad \emptyset \vdash V_2 : T}{\emptyset \vdash V_1 V_2 : C}$$

for some  $V_1$ ,  $V_2$ , and  $T$  such that  $M = V_1 V_2$ . By case analysis on the result of applying Lemma 3 to  $\emptyset \vdash V_1 : T \rightarrow C$ .

Case  $\exists x, M_1. V_1 = \lambda x.M_1$ : By (HE\_BETA).

Case  $\exists x, V_1'. V_1 = \text{fix } x.V_1'$ : By (HE\_FIX).

Case (HT\_CASE): We are given

$$\frac{\emptyset \vdash V : \mathbf{n} \quad \forall i \in [1, n]. \emptyset \vdash M_i : C}{\emptyset \vdash \text{case}(V; M_1, \dots, M_n) : C}$$

for some  $V, n, M_1, \dots, M_n$  such that  $M = \text{case}(V; M_1, \dots, M_n)$ . By Lemma 3,  $V = \underline{i}$  for some  $i$  such that  $0 < i \leq n$ . Thus, we have the conclusion by (HE\_CASE).

Case (HT\_OP): Obvious.

Case (HT\_HANDLE): We are given

$$\frac{H = \{\text{return } x \mapsto M_0\} \uplus \{\sigma_i(x_i; k_i) \mapsto M_i\}^{1 \leq i \leq n} \quad \Sigma = \{\sigma_i : T_i^{\text{par}} \rightsquigarrow T_i^{\text{ari}} / C_i^{\text{ini}} \Rightarrow C_i^{\text{fin}}\}^{1 \leq i \leq n}}{\emptyset \vdash M' : \Sigma \triangleright T / C^{\text{ini}} \Rightarrow C \quad x : T \vdash M_0 : C^{\text{ini}} \quad \forall i \in [1, n]. x_i : T_i^{\text{par}}, k_i : T_i^{\text{ari}} \rightarrow C_i^{\text{ini}} \vdash M_i : C_i^{\text{fin}}}{\emptyset \vdash \text{with } H \text{ handle } M' : C}$$

for some  $H, M', x, M_0, \sigma_1, \dots, \sigma_n, x_1 \dots, x_n, k_1 \dots, k_n, M_1, \dots, M_n, \Sigma, \sigma_1, \dots, \sigma_n, T_1^{\text{par}}, \dots, T_n^{\text{par}}, T_1^{\text{ari}}, \dots, T_n^{\text{ari}}, C_1^{\text{ini}}, \dots, C_n^{\text{ini}}, C_1^{\text{fin}}, \dots, C_n^{\text{fin}}, T$ , and  $C^{\text{ini}}$  such that  $M = \text{with } H \text{ handle } M'$ . By case analysis on the result of the IH on  $\emptyset \vdash M' : \Sigma \triangleright T / C^{\text{ini}} \Rightarrow C$ .

Case  $\exists V'. M' = \text{return } V'$ : By (HE\_HANDLEV).

Case  $\exists \sigma, V', y, M''.$   $M' = \sigma(V'; y. M'')$ : By the inversion of  $\emptyset \vdash \sigma(V'; y. M'') : \Sigma \triangleright T / C^{\text{ini}} \Rightarrow C$ , we have  $\sigma = \sigma_i$  for some  $i$ . Then, we have the conclusion by (HE\_HANDLEOP).

Case  $\exists M''.$   $M' \rightarrow M''$ : By (HE\_HANDLEE).

□

**Lemma 5** (Subject Reduction). *If  $\Gamma \vdash M : C$  and  $M \rightarrow M'$ , then  $\Gamma \vdash M' : C$ .*

*Proof.* By induction on the typing derivation.

Case (HT\_RETURN): We have  $M = \text{return } V$  for some  $V$ , but there is a contradiction because there is no evaluation rule applicable to  $\text{return } V$ .

Case (HT\_LET): We are given

$$\frac{\Gamma \vdash M_1 : \Sigma \triangleright T_1 / A \Rightarrow A_1 \quad \Gamma, x : T_1 \vdash M_2 : \Sigma \triangleright T_2 / A_2 \Rightarrow A}{\Gamma \vdash \text{let } x = M_1 \text{ in } M_2 : \Sigma \triangleright T_2 / A_2 \Rightarrow A_1}$$

for some  $x, M_1, M_2, \Sigma, T_1, T_2, A_1, A_2$ , and  $A$  such that  $M = (\text{let } x = M_1 \text{ in } M_2)$  and  $C = \Sigma \triangleright T_2 / A_2 \Rightarrow A_1$ . We have  $\text{let } x = M_1 \text{ in } M_2 \rightarrow M'$ . By case analysis on the evaluation rule applied last to derive it.

Case (HE\_LETV): We are given

$$\text{let } x = \text{return } V_1 \text{ in } M_2 \rightarrow M_2[V_1/x]$$

for some  $V_1$  such that  $M_1 = \text{return } V_1$  and  $M' = M_2[V_1/x]$ . Because  $\Gamma \vdash \text{return } V_1 : \Sigma \triangleright T_1 / A \Rightarrow A_1$ , its inversion implies  $\Gamma \vdash V_1 : T_1$  and  $A = A_1$ . Thus,  $\Gamma, x : T_1 \vdash M_2 : \Sigma \triangleright T_2 / A_2 \Rightarrow A_1$ . By Lemma 2, we have the conclusion  $\Gamma \vdash M_2[V_1/x] : \Sigma \triangleright T_2 / A_2 \Rightarrow A_1$ .

Case (HE\_LETOP): We are given

$$\text{let } x = \sigma(V_1; y. M_1') \text{ in } M_2 \rightarrow \sigma(V_1; y. \text{let } x = M_1' \text{ in } M_2)$$

for some  $\sigma, V_1, y$ , and  $M_1'$  such that  $M_1 = \sigma(V_1; y. M_1')$  and  $M' = \sigma(V_1; y. \text{let } x = M_1' \text{ in } M_2)$  and  $y \notin \text{fv}(M_2)$ . Because  $\Gamma \vdash \sigma(V_1; y. M_1') : \Sigma \triangleright T_1 / A \Rightarrow A_1$ , its inversion implies

- $\sigma : T^{\text{par}} \rightsquigarrow T^{\text{ari}} / A^{\text{ini}} \Rightarrow A^{\text{fin}} \in \Sigma$ ,

- $A_1 = A^{\text{fin}}$ ,
- $\Gamma \vdash V_1 : T^{\text{par}}$ , and
- $\Gamma, y : T^{\text{ari}} \vdash M'_1 : \Sigma \triangleright T_1 / A \Rightarrow A^{\text{ini}}$

for some  $T^{\text{par}}$ ,  $T^{\text{ari}}$ ,  $A^{\text{ini}}$ , and  $A^{\text{fin}}$ . By Lemma 1,  $\Gamma, y : T^{\text{ari}}, x : T_1 \vdash M_2 : \Sigma \triangleright T_2 / A_2 \Rightarrow A$ . By (HT\_LET),

$$\Gamma, y : T^{\text{ari}} \vdash \text{let } x = M'_1 \text{ in } M_2 : \Sigma \triangleright T_2 / A_2 \Rightarrow A^{\text{ini}} .$$

By (HT\_OP) with  $A_1 = A^{\text{fin}}$ , we have the conclusion

$$\Gamma \vdash \sigma(V_1; y. \text{let } x = M'_1 \text{ in } M_2) : \Sigma \triangleright T_2 / A_2 \Rightarrow A_1 .$$

Case (HE\_LETE): We are given

$$M_1 \longrightarrow M'_1$$

for some  $M'_1$  such that  $M' = (\text{let } x = M'_1 \text{ in } M_2)$ . By the IH,  $\Gamma \vdash M'_1 : \Sigma \triangleright T_1 / A \Rightarrow A_1$ . Therefore, by (HT\_LET), we have the conclusion

$$\Gamma \vdash \text{let } x = M'_1 \text{ in } M_2 : \Sigma \triangleright T_2 / A_2 \Rightarrow A_1 .$$

Case (HT\_APP): We are given

$$\frac{\Gamma \vdash V_1 : T \rightarrow C \quad \Gamma \vdash V_2 : T}{\Gamma \vdash V_1 V_2 : C}$$

for some  $V_1$ ,  $V_2$ , and  $T$  such that  $M = V_1 V_2$ . We have  $V_1 V_2 \longrightarrow M'$ . By case analysis on the evaluation rule applied last to derive it.

Case (HE\_BETA): We are given

$$(\lambda x. M_1) V_2 \longrightarrow M_1[V_2/x]$$

for some  $x$  and  $M_1$  such that  $V_1 = \lambda x. M_1$  and  $M' = M_1[V_2/x]$ . By the inversion of  $\Gamma \vdash \lambda x. M_1 : T \rightarrow C$ , we have  $\Gamma, x : T \vdash M_1 : C$ . Because  $\Gamma \vdash V_2 : T$ , we have the conclusion  $\Gamma \vdash M_1[V_2/x] : C$  by Lemma 2.

Case (HE\_FIX): We are given

$$(\text{fix } x. V'_1) V_2 \longrightarrow V'_1[\text{fix } x. V'_1/x] V_2$$

for some  $x$  and  $V'_1$  such that  $V_1 = \text{fix } x. V'_1$  and  $M' = V'_1[\text{fix } x. V'_1/x] V_2$ . By the inversion of  $\Gamma \vdash \text{fix } x. V'_1 : T \rightarrow C$ , we have  $\Gamma, x : T \rightarrow C \vdash V'_1 : T \rightarrow C$ . By Lemma 2,  $\Gamma \vdash V'_1[\text{fix } x. V'_1/x] : T \rightarrow C$ . Therefore, by (HT\_APP), we have the conclusion

$$\Gamma \vdash V'_1[\text{fix } x. V'_1/x] V_2 : C .$$

Case (HT\_CASE): We are given

$$\frac{\Gamma \vdash V : n \quad \forall i \in [1, n]. \Gamma \vdash M_i : C}{\Gamma \vdash \text{case}(V; M_1, \dots, M_n) : C}$$

for some  $V$ ,  $n$ ,  $M_1, \dots, M_n$  such that  $M = \text{case}(V; M_1, \dots, M_n)$ . Because  $\text{case}(V; M_1, \dots, M_n) \longrightarrow M'$ , we have  $V = \underline{i}$  and  $M' = M_i$  for some  $i$  such that  $0 < i \leq n$ . Because  $\Gamma \vdash M_i : C$ , we have the conclusion.

Case (HT\_OP): We have  $M = \sigma(V; x. M'')$  for some  $\sigma$ ,  $V$ ,  $x$ , and  $M''$ , but there is a contradiction because there is no evaluation rule applicable to  $\sigma(V; x. M'')$ .

Case (HT\_HANDLE): We are given

$$\frac{H = \{\text{return } x \mapsto M_0\} \uplus \{\sigma_i(x_i; k_i) \mapsto M_i\}^{1 \leq i \leq n} \quad \Sigma = \{\sigma_i : T_i^{\text{par}} \rightsquigarrow T_i^{\text{ari}} / C_i^{\text{ini}} \Rightarrow C_i^{\text{fin}}\}^{1 \leq i \leq n}}{\Gamma \vdash M'_0 : \Sigma \triangleright T / C^{\text{ini}} \Rightarrow C \quad \Gamma, x : T \vdash M_0 : C^{\text{ini}} \quad \forall i \in [1, n]. \Gamma, x_i : T_i^{\text{par}}, k_i : T_i^{\text{ari}} \rightarrow C_i^{\text{ini}} \vdash M_i : C_i^{\text{fin}}}{\Gamma \vdash \text{with } H \text{ handle } M'_0 : C}$$

for some  $H$ ,  $M'_0$ ,  $x$ ,  $M_0$ ,  $\sigma_1, \dots, \sigma_n$ ,  $x_1 \dots, x_n$ ,  $k_1 \dots, k_n$ ,  $M_1, \dots, M_n$ ,  $\Sigma$ ,  $\sigma_1, \dots, \sigma_n$ ,  $T_1^{\text{par}}, \dots, T_n^{\text{par}}$ ,  $T_1^{\text{ari}}, \dots, T_n^{\text{ari}}$ ,  $C_1^{\text{ini}}, \dots, C_n^{\text{ini}}$ ,  $C_1^{\text{fin}}, \dots, C_n^{\text{fin}}$ ,  $T$ , and  $C^{\text{ini}}$  such that  $M = \text{with } H \text{ handle } M'_0$ . We have  $\text{with } H \text{ handle } M'_0 \longrightarrow M'$ . By case analysis on the evaluation rule applied last to derive it.

Case (HE\_HANDLEV): We are given

$$\text{with } H \text{ handle return } V \longrightarrow M_0[V/x]$$

for some  $V$  such that  $M'_0 = \text{return } V$  and  $M' = M_0[V/x]$ . By the inversion of  $\Gamma \vdash \text{return } V : \Sigma \triangleright T / C^{\text{ini}} \Rightarrow C$ , we have  $\Gamma \vdash V : T$  and  $C^{\text{ini}} = C$ . By Lemma 2 with  $\Gamma, x : T \vdash M_0 : C^{\text{ini}}$ , we have the conclusion  $\Gamma \vdash M_0[V/x] : C$ .

Case (HE\_HANDLEOP): We are given

$$\text{with } H \text{ handle } \sigma_i(V; y. M_0'') \longrightarrow M_i[V/x_i][\lambda y. \text{with } H \text{ handle } M_0''/k_i]$$

for some  $i$ ,  $V$ ,  $y$ , and  $M_0''$  such that  $M'_0 = \sigma_i(V; y. M_0'')$  and  $M' = M_i[V/x_i][\lambda y. \text{with } H \text{ handle } M_0''/k_i]$ . By the inversion of  $\Gamma \vdash \sigma_i(V; y. M_0'') : \Sigma \triangleright T / C^{\text{ini}} \Rightarrow C$ , we have

- $C = C_i^{\text{fin}}$ ,
- $\Gamma \vdash V : T_i^{\text{par}}$ , and
- $\Gamma, y : T_i^{\text{ari}} \vdash M_0'' : \Sigma \triangleright T / C^{\text{ini}} \Rightarrow C_i^{\text{ini}}$ .

By Lemma 1,

- $\Gamma, y : T_i^{\text{ari}}, x : T \vdash M_0 : C^{\text{ini}}$  and
- $\forall j \in [1, n]. \Gamma, y : T_i^{\text{ari}}, x_i : T_i^{\text{par}}, k_i : T_i^{\text{ari}} \rightarrow C_i^{\text{ini}} \vdash M_i : C_i^{\text{fin}}$ .

Therefore, by (HT\_HANDLE) and (HT\_ABS),

$$\Gamma \vdash \lambda y. \text{with } H \text{ handle } M_0'' : T_i^{\text{ari}} \rightarrow C_i^{\text{ini}} .$$

Thus, by Lemma 2 and  $C = C_i^{\text{fin}}$ , we have the conclusion

$$\Gamma \vdash M_i[V/x_i][\lambda y. \text{with } H \text{ handle } M_0''/k_i] : C .$$

Case (HE\_HANDLEE): We are given  $M'_0 \longrightarrow M_0''$  for some  $M_0''$  such that  $M' = \text{with } H \text{ handle } M_0''$ . By the IH,  $\Gamma \vdash M_0'' : \Sigma \triangleright T / C^{\text{ini}} \Rightarrow C$ . By (HT\_HANDLE), we have the conclusion

$$\Gamma \vdash \text{with } H \text{ handle } M_0'' : C .$$

□

### 3.2 Type Soundness of EPCF

**Lemma 6** (Weakening). *Assume that  $\text{dom}(\Delta_2) \cap \text{dom}(\Delta_1, \Delta_3)$  is empty.*

- If  $\Xi \parallel \Delta_1, \Delta_3 \vdash v : \tau$ , then  $\Xi \parallel \Delta_1, \Delta_2, \Delta_3 \vdash v : \tau$ .
- If  $\Xi \parallel \Delta_1, \Delta_3 \vdash e : \tau$ , then  $\Xi \parallel \Delta_1, \Delta_2, \Delta_3 \vdash e : \tau$ .

*Proof.* Straightforward by mutual induction on the typing derivations. □

**Lemma 7** (Value Substitution). *Assume that  $\Xi \parallel \Delta_1 \vdash v_0 : \tau_0$ .*

- If  $\Xi \parallel \Delta_1, x : \tau_0, \Delta_2 \vdash v : \tau$ , then  $\Xi \parallel \Delta_1, \Delta_2 \vdash v[v_0/x] : \tau$ .
- If  $\Xi \parallel \Delta_1, x : \tau_0, \Delta_2 \vdash e : \tau$ , then  $\Xi \parallel \Delta_1, \Delta_2 \vdash e[v_0/x] : \tau$ .

*Proof.* Straightforward by mutual induction on the typing derivations. The case for (T\_VAR) rests on Lemma 6. □

**Lemma 8** (Canonical Forms). *Assume that  $\Xi \parallel \emptyset \vdash v : \tau$ .*

- If  $\tau = B$ , then  $v = c$  for some  $c$  such that  $\text{ty}(c) = B$ .
- If  $\tau = n$ , then  $v = \underline{i}$  for some  $i$  such that  $0 < i \leq n$ .

- If  $\tau = \tau_1 \rightarrow \tau_2$ , then  $v = \lambda x.e$  for some  $x$  and  $e$ , or  $v = \text{fix } x.v'$  for some  $x$  and  $v'$ .

*Proof.* Straightforward by case analysis on the typing derivation. Note that, for any  $c$ ,  $\text{ty}(c) = B$  for some  $B$  by Assumption 1.  $\square$

**Lemma 9** (Progress). *If  $\Xi \parallel \emptyset \vdash e : \tau$ , then one of the following holds:*

- $e = \text{return } v$  for some  $v$ ;
- $e = \sigma(v; x. e')$  for some  $\sigma, v, x$ , and  $e'$ ; or
- $e \longrightarrow e'$  for some  $e'$ .

*Proof.* By induction on the typing derivation applied last to derive  $\Xi \parallel \emptyset \vdash e : \tau$ .

Case (T\_RETURN): Obvious.

Case (T\_LET): We are given

$$\frac{\Xi \parallel \emptyset \vdash e_1 : \tau_1 \quad \Xi \parallel x : \tau_1 \vdash e_2 : \tau}{\Xi \parallel \emptyset \vdash \text{let } x = e_1 \text{ in } e_2 : \tau}$$

for some  $x, e_1, e_2$ , and  $\tau_1$  such that  $e = (\text{let } x = e_1 \text{ in } e_2)$ . By case analysis on the result of the IH on  $\Xi \parallel \emptyset \vdash e_1 : \tau_1$ .

Case  $\exists v_1. e_1 = \text{return } v_1$ : By (E\_LETV).

Case  $\exists \sigma, v_1, y, e'_1. e_1 = \sigma(v_1; y. e'_1)$ : By (E\_LETOP).

Case  $\exists e'_1. e_1 \longrightarrow e'_1$ : By (E\_LETE).

Case (T\_APP): We are given

$$\frac{\Xi \parallel \emptyset \vdash v_1 : \tau' \rightarrow \tau \quad \Xi \parallel \emptyset \vdash v_2 : \tau'}{\Xi \parallel \emptyset \vdash v_1 v_2 : \tau}$$

for some  $v_1, v_2$ , and  $\tau'$  such that  $e = v_1 v_2$ . By case analysis on the result of applying Lemma 8 to  $\Xi \parallel \emptyset \vdash v_1 : \tau' \rightarrow \tau$ .

Case  $\exists x, e_1. v_1 = \lambda x.e_1$ : By (E\_BETA).

Case  $\exists x, v'_1. v_1 = \text{fix } x.v'_1$ : By (E\_FIX).

Case (T\_CASE): We are given

$$\frac{\Xi \parallel \emptyset \vdash v : \mathbf{n} \quad \forall i \in [1, n]. \Xi \parallel \emptyset \vdash e_i : \tau}{\Xi \parallel \emptyset \vdash \text{case}(v; e_1, \dots, e_n) : \tau}$$

for some  $v, n, e_1, \dots, e_n$  such that  $e = \text{case}(v; e_1, \dots, e_n)$ . By Lemma 8,  $v = \mathbf{i}$  for some  $i$  such that  $0 < i \leq n$ . Thus, we have the conclusion by (E\_CASE).

Case (T\_OP): Obvious.  $\square$

**Lemma 10** (Subject Reduction). *If  $\Xi \parallel \Delta \vdash e : \tau$  and  $e \longrightarrow e'$ , then  $\Xi \parallel \Delta \vdash e' : \tau$ .*

*Proof.* By induction on the typing derivation.

Case (T\_RETURN): We have  $e = \text{return } v$  for some  $v$ , but there is a contradiction because there is no evaluation rule applicable to  $\text{return } v$ .

Case (T\_LET): We are given

$$\frac{\Xi \parallel \Delta \vdash e_1 : \tau_1 \quad \Xi \parallel \Delta, x : \tau_1 \vdash e_2 : \tau}{\Xi \parallel \Delta \vdash \text{let } x = e_1 \text{ in } e_2 : \tau}$$

for some  $x$ ,  $e_1$ ,  $e_2$ , and  $\tau_1$  such that  $e = (\text{let } x = e_1 \text{ in } e_2)$ . We have  $\text{let } x = e_1 \text{ in } e_2 \longrightarrow e'$ . By case analysis on the evaluation rule applied last to derive it.

Case (E\_LETV): We are given

$$\text{let } x = \text{return } v_1 \text{ in } e_2 \longrightarrow e_2[v_1/x]$$

for some  $v_1$  such that  $e_1 = \text{return } v_1$  and  $e' = e_2[v_1/x]$ . Because  $\Xi \parallel \Delta \vdash \text{return } v_1 : \tau_1$ , its inversion implies  $\Xi \parallel \Delta \vdash v_1 : \tau_1$ . By Lemma 7, we have the conclusion  $\Xi \parallel \Delta \vdash e_2[v_1/x] : \tau$ .

Case (E\_LETOP): We are given

$$\text{let } x = \sigma(v_1; y, e'_1) \text{ in } e_2 \longrightarrow \sigma(v_1; y, \text{let } x = e'_1 \text{ in } e_2)$$

for some  $\sigma$ ,  $v_1$ ,  $y$ , and  $e'_1$  such that  $e_1 = \sigma(v_1; y, e'_1)$  and  $e' = \sigma(v_1; y, \text{let } x = e'_1 \text{ in } e_2)$  and  $y \notin \text{fv}(e_2)$ . Because  $\Xi \parallel \Delta \vdash \sigma(v_1; y, e'_1) : \tau_1$ , its inversion implies

- $\sigma : B \rightsquigarrow E \in \Xi$ ,
- $\Xi \parallel \Delta \vdash v_1 : B$ , and
- $\Xi \parallel \Delta, y : E \vdash e'_1 : \tau_1$

for some  $B$  and  $E$ . By Lemma 6,  $\Xi \parallel \Delta, y : E, x : \tau_1 \vdash e_2 : \tau$ . By (T\_LET),

$$\Xi \parallel \Delta, y : E \vdash \text{let } x = e'_1 \text{ in } e_2 : \tau .$$

By (T\_OP), we have the conclusion

$$\Xi \parallel \Delta \vdash \sigma(v_1; y, \text{let } x = e'_1 \text{ in } e_2) : \tau .$$

Case (E\_LETE): We are given

$$e_1 \longrightarrow e'_1$$

for some  $e'_1$  such that  $e' = (\text{let } x = e'_1 \text{ in } e_2)$ . By the IH,  $\Xi \parallel \Delta \vdash e'_1 : \tau_1$ . Therefore, by (T\_LET), we have the conclusion

$$\Xi \parallel \Delta \vdash \text{let } x = e'_1 \text{ in } e_2 : \tau .$$

Case (T\_APP): We are given

$$\frac{\Xi \parallel \Delta \vdash v_1 : \tau' \rightarrow \tau \quad \Xi \parallel \Delta \vdash v_2 : \tau'}{\Xi \parallel \Delta \vdash v_1 v_2 : \tau}$$

for some  $v_1$ ,  $v_2$ , and  $\tau'$  such that  $e = v_1 v_2$ . We have  $v_1 v_2 \longrightarrow e'$ . By case analysis on the evaluation rule applied last to derive it.

Case (E\_BETA): We are given

$$(\lambda x. e_1) v_2 \longrightarrow e_1[v_2/x]$$

for some  $x$  and  $e_1$  such that  $v_1 = \lambda x. e_1$  and  $e' = e_1[v_2/x]$ . By the inversion of  $\Xi \parallel \Delta \vdash \lambda x. e_1 : \tau' \rightarrow \tau$ , we have  $\Xi \parallel \Delta, x : \tau' \vdash e_1 : \tau$ . Because  $\Xi \parallel \Delta \vdash v_2 : \tau'$ , we have the conclusion  $\Xi \parallel \Delta \vdash e_1[v_2/x] : \tau$  by Lemma 7.

Case (E\_FIX): We are given

$$(\text{fix } x. v'_1) v_2 \longrightarrow v'_1[\text{fix } x. v'_1/x] v_2$$

for some  $x$  and  $v'_1$  such that  $v_1 = \text{fix } x. v'_1$  and  $e' = v'_1[\text{fix } x. v'_1/x] v_2$ . By the inversion of  $\Xi \parallel \Delta \vdash \text{fix } x. v'_1 : \tau' \rightarrow \tau$ , we have  $\Xi \parallel \Delta, x : \tau' \rightarrow \tau \vdash v'_1 : \tau' \rightarrow \tau$ . By Lemma 7,  $\Xi \parallel \Delta \vdash v'_1[\text{fix } x. v'_1/x] : \tau' \rightarrow \tau$ . Therefore, by (T\_APP), we have the conclusion

$$\Xi \parallel \Delta \vdash v'_1[\text{fix } x. v'_1/x] v_2 : \tau .$$

Case (T\_CASE): We are given

$$\frac{\Xi \parallel \Delta \vdash v : \mathbf{n} \quad \forall i \in [1, n]. \Xi \parallel \Delta \vdash e_i : \tau}{\Xi \parallel \Delta \vdash \text{case}(v; e_1, \dots, e_n) : \tau}$$

for some  $v, n, e_1, \dots, e_n$  such that  $e = \text{case}(v; e_1, \dots, e_n)$ . Because  $\text{case}(v; e_1, \dots, e_n) \longrightarrow e'$ , we have  $v = \mathbf{i}$  and  $e' = e_i$  for some  $i$  such that  $0 < i \leq n$ . Because  $\Xi \parallel \Delta \vdash e_i : \tau$ , we have the conclusion.

Case (T\_OP): We have  $e = \sigma(v; x. e'')$  for some  $\sigma, v, x$ , and  $e''$ , but there is a contradiction because there is no evaluation rule applicable to  $\sigma(v; x. e'')$ .

□

### 3.3 Type Preservation

**Definition 22** (Pre-Order on Typing Contexts). *We write  $\Delta_1 \preceq \Delta_2$  if  $\text{dom}(\Delta_1) \subseteq \text{dom}(\Delta_2)$  and, for any  $x \in \text{dom}(\Delta_1)$ ,  $\Delta_1(x) = \Delta_2(x)$ .*

**Definition 23** (Typing of Effect Handlers). *Let  $\Sigma = \{\sigma_i : T_i^{\text{par}} \rightsquigarrow T_i^{\text{ari}} / A_i^{\text{ini}} \Rightarrow A_i^{\text{fin}}\}^{1 \leq i \leq n}$  for some  $\sigma_1, \dots, \sigma_n$ ,  $T_1^{\text{par}}, \dots, T_n^{\text{par}}$ ,  $T_1^{\text{ari}}, \dots, T_n^{\text{ari}}$ ,  $A_1^{\text{ini}}, \dots, A_n^{\text{ini}}$ , and  $A_1^{\text{fin}}, \dots, A_n^{\text{fin}}$  such that  $\sigma_1, \dots, \sigma_n$  are ordered. For a variable sequence  $\bar{h} = h_1, \dots, h_n$ , we write  $\bar{h} : \Sigma$  to denote the typing context that, for each  $i \in [1, n]$ , assigns to the variable  $h_i$  the type  $\llbracket T_i^{\text{par}} \rrbracket \rightarrow (\llbracket T_i^{\text{ari}} \rrbracket \rightarrow \llbracket A_i^{\text{ini}} \rrbracket) \rightarrow \llbracket A_i^{\text{fin}} \rrbracket$ . For a value sequence  $\bar{v}^{\text{h}} = v_1^{\text{h}}, \dots, v_n^{\text{h}}$ , we write  $\Xi \parallel \Delta \vdash \bar{v}^{\text{h}} : \Sigma$  if, for each  $i \in [1, n]$ ,  $\Xi \parallel \Delta \vdash v_i^{\text{h}} : \llbracket T_i^{\text{par}} \rrbracket \rightarrow (\llbracket T_i^{\text{ari}} \rrbracket \rightarrow \llbracket A_i^{\text{ini}} \rrbracket) \rightarrow \llbracket A_i^{\text{fin}} \rrbracket$  holds.*

**Lemma 11** (Type Preservation of the CPS Transformation). *Assume that  $\llbracket \Gamma \rrbracket \preceq \Delta$ .*

- If  $\Gamma \vdash V : T$ , then  $\Xi \parallel \Delta \vdash \llbracket V \rrbracket : \llbracket T \rrbracket$  for any  $\Xi$ .
- If  $\Gamma \vdash M : \Sigma \triangleright T / A^{\text{ini}} \Rightarrow A^{\text{fin}}$  and  $\Xi \parallel \Delta \vdash \bar{v}^{\text{h}} : \Sigma$  and  $\Xi \parallel \Delta \vdash v^{\text{k}} : \llbracket T \rrbracket \rightarrow \llbracket A^{\text{ini}} \rrbracket$ , then  $\Xi \parallel \Delta \vdash \llbracket M \rrbracket[\bar{v}^{\text{h}} \mid v^{\text{k}}] : \llbracket A^{\text{fin}} \rrbracket$ .
- If  $\Gamma \vdash M : C$ , then  $\Xi \parallel \Delta \vdash \llbracket M \rrbracket : \llbracket C \rrbracket$  for any  $\Xi$ .

*Proof.* By mutual induction on the typing derivations.

- Assume that  $\Gamma \vdash V : T$  is given. By case analysis on the typing rule applied last to derive it.
  - Case (HT\_VAR): Obvious by (T\_VAR).
  - Case (HT\_CONST): Obvious by (T\_CONST). Note that  $\text{ty}(c)$  is base type by Assumption 1.
  - Case (HT\_ECONST): Obvious by (T\_ECONST).
  - Case (HT\_ABS): We are given  $\Gamma \vdash \lambda x. M : T' \rightarrow C'$  for some  $x, M, T'$ , and  $C'$  such that  $V = \lambda x. M$  and  $T = T' \rightarrow C'$ . By inversion,  $\Gamma, x : T' \vdash M : C'$ . Because  $\llbracket \Gamma \rrbracket \preceq \Delta$ , we have  $\llbracket \Gamma \rrbracket, x : \llbracket T' \rrbracket \preceq \Delta, x : \llbracket T' \rrbracket$ . Therefore, by the IH,  $\Xi \parallel \Delta, x : \llbracket T' \rrbracket \vdash \llbracket M \rrbracket : \llbracket C' \rrbracket$ . By (T\_RETURN) and (T\_ABS),  $\Xi \parallel \Delta \vdash \lambda x. \text{return } \llbracket M \rrbracket : \llbracket T' \rrbracket \rightarrow \llbracket C' \rrbracket$ . By the definition of the CPS transformation, we have the conclusion.
  - Case (HT\_FIX): We are given  $\Gamma \vdash \text{fix } x. V' : T' \rightarrow C'$  for some  $x, V', T'$ , and  $C'$  such that  $V = \text{fix } x. V'$  and  $T = T' \rightarrow C'$ . By inversion,  $\Gamma, x : T' \rightarrow C' \vdash V' : T' \rightarrow C'$ . Because  $\llbracket \Gamma \rrbracket \preceq \Delta$ , we have  $\llbracket \Gamma \rrbracket, x : \llbracket T' \rrbracket \rightarrow \llbracket C' \rrbracket \preceq \Delta, x : \llbracket T' \rrbracket \rightarrow \llbracket C' \rrbracket$ . Therefore, by the IH,  $\Xi \parallel \Delta, x : \llbracket T' \rrbracket \rightarrow \llbracket C' \rrbracket \vdash \llbracket V' \rrbracket : \llbracket T' \rrbracket \rightarrow \llbracket C' \rrbracket$ . By (T\_FIX),  $\Xi \parallel \Delta \vdash \text{fix } x. \llbracket V' \rrbracket : \llbracket T' \rrbracket \rightarrow \llbracket C' \rrbracket$ . By the definition of the CPS transformation, we have the conclusion.
- Assume that  $\Gamma \vdash M : \Sigma \triangleright T / A^{\text{ini}} \Rightarrow A^{\text{fin}}$  is given. Let  $\Sigma = \{\sigma_i : T_i^{\text{par}} \rightsquigarrow T_i^{\text{ari}} / A_i^{\text{ini}} \Rightarrow A_i^{\text{fin}}\}^{1 \leq i \leq n}$  for some  $\sigma_1, \dots, \sigma_n$ ,  $T_1^{\text{par}}, \dots, T_n^{\text{par}}$ ,  $T_1^{\text{ari}}, \dots, T_n^{\text{ari}}$ ,  $A_1^{\text{ini}}, \dots, A_n^{\text{ini}}$ , and  $A_1^{\text{fin}}, \dots, A_n^{\text{fin}}$  such that  $\sigma_1, \dots, \sigma_n$  are ordered. By case analysis on the typing rule applied last to derive it.

Case (HT\_RETURN): We are given

$$\frac{\Gamma \vdash V : T}{\Gamma \vdash \text{return } V : \Sigma \triangleright T / A \Rightarrow A}$$



for some  $V$  and  $A$  such that  $M = \text{return } V$  and  $A^{\text{ini}} = A^{\text{fin}} = A$ . By the IH,  $\Xi \parallel \Delta \vdash \llbracket V \rrbracket : \llbracket T \rrbracket$ . By the definition, it suffices to show that

$$\Xi \parallel \Delta \vdash v^k \llbracket V \rrbracket : \llbracket A \rrbracket ,$$

which is derived as follows:

$$\frac{\Xi \parallel \Delta \vdash v^k : \llbracket T \rrbracket \rightarrow \llbracket A \rrbracket \quad \Xi \parallel \Delta \vdash \llbracket V \rrbracket : \llbracket T \rrbracket}{\Xi \parallel \Delta \vdash v^k \llbracket V \rrbracket : \llbracket A \rrbracket} \text{(T\_APP)}$$

Case (HT\_LET): We are given

$$\frac{\Gamma \vdash M_1 : \Sigma \triangleright T_1 / A \Rightarrow A^{\text{fin}} \quad \Gamma, x : T_1 \vdash M_2 : \Sigma \triangleright T / A^{\text{ini}} \Rightarrow A}{\Gamma \vdash \text{let } x = M_1 \text{ in } M_2 : \Sigma \triangleright T / A^{\text{ini}} \Rightarrow A^{\text{fin}}}$$

for some  $x, M_1, M_2, T_1$ , and  $A$  such that  $M = (\text{let } x = M_1 \text{ in } M_2)$ . Without loss of generality, we can assume that  $x \notin \text{dom}(\Delta)$ . By the definition, it suffices to show that

$$\Xi \parallel \Delta \vdash \llbracket M_1 \rrbracket [\overline{v^h} \mid \lambda x. \llbracket M_2 \rrbracket [\overline{v^h} \mid v^k]] : \llbracket A^{\text{fin}} \rrbracket .$$

Because  $\llbracket \Gamma \rrbracket \preceq \Delta$ , we have  $\llbracket \Gamma \rrbracket, x : \llbracket T_1 \rrbracket \preceq \Delta, x : \llbracket T_1 \rrbracket$ . By Lemma 6,  $\Xi \parallel \Delta, x : \llbracket T_1 \rrbracket \vdash \overline{v^h} : \Sigma$  and  $\Xi \parallel \Delta, x : \llbracket T_1 \rrbracket \vdash v^k : \llbracket T \rrbracket \rightarrow \llbracket A^{\text{ini}} \rrbracket$ . Therefore, by the IH on  $\Gamma, x : T_1 \vdash M_2 : \Sigma \triangleright T / A^{\text{ini}} \Rightarrow A$ , we have

$$\Xi \parallel \Delta, x : \llbracket T_1 \rrbracket \vdash \llbracket M_2 \rrbracket [\overline{v^h} \mid v^k] : \llbracket A \rrbracket .$$

By (T\_ABS),

$$\Xi \parallel \Delta \vdash \lambda x. \llbracket M_2 \rrbracket [\overline{v^h} \mid v^k] : \llbracket T_1 \rrbracket \rightarrow \llbracket A \rrbracket .$$

Therefore, by the IH on  $\Gamma \vdash M_1 : \Sigma \triangleright T_1 / A \Rightarrow A^{\text{fin}}$ , we have the conclusion

$$\Xi \parallel \Delta \vdash \llbracket M_1 \rrbracket [\overline{v^h} \mid \lambda x. \llbracket M_2 \rrbracket [\overline{v^h} \mid v^k]] : \llbracket A^{\text{fin}} \rrbracket .$$

Case (HT\_APP): We are given

$$\frac{\Gamma \vdash V_1 : T' \rightarrow \Sigma \triangleright T / A^{\text{ini}} \Rightarrow A^{\text{fin}} \quad \Gamma \vdash V_2 : T'}{\Gamma \vdash V_1 V_2 : \Sigma \triangleright T / A^{\text{ini}} \Rightarrow A^{\text{fin}}}$$

for some  $V_1, V_2$ , and  $T'$  such that  $M = V_1 V_2$ . By the definition, it suffices to show that

$$\Xi \parallel \Delta \vdash \llbracket V_1 \rrbracket \llbracket V_2 \rrbracket \overline{v^h} v^k : \llbracket A^{\text{fin}} \rrbracket .$$

Then, it suffices to show that

$$\Xi \parallel \Delta \vdash \llbracket V_1 \rrbracket \llbracket V_2 \rrbracket : \llbracket \Sigma \rrbracket [(\llbracket T \rrbracket \rightarrow \llbracket A^{\text{ini}} \rrbracket) \rightarrow \llbracket A^{\text{fin}} \rrbracket] ,$$

which is derived by the IHs and (T\_APP).

Case (HT\_CASE): We are given

$$\frac{\Gamma \vdash V : \mathbf{n} \quad \forall i \in [1, n]. \Gamma \vdash M_i : \Sigma \triangleright T / A^{\text{ini}} \Rightarrow A^{\text{fin}}}{\Gamma \vdash \text{case}(V; M_1, \dots, M_n) : \Sigma \triangleright T / A^{\text{ini}} \Rightarrow A^{\text{fin}}}$$

for some  $V_1, M_1, \dots, M_n$ , and  $n$  such that  $M = \text{case}(V; M_1, \dots, M_n)$ . By the definition, it suffices to show that

$$\Xi \parallel \Delta \vdash \text{case}(\llbracket V \rrbracket; \llbracket M_1 \rrbracket [\overline{v^h} \mid v^k], \dots, \llbracket M_n \rrbracket [\overline{v^h} \mid v^k]) : \llbracket A^{\text{fin}} \rrbracket .$$

By the IHs,

- $\Xi \parallel \Delta \vdash \llbracket V \rrbracket : \mathbf{n}$  and
- $\forall i \in [1, n]. \Xi \parallel \Delta \vdash \llbracket M_i \rrbracket [\overline{v^h} \mid v^k] : \llbracket A^{\text{fin}} \rrbracket$ .

Therefore, by (T\_CASE), we have the conclusion.

Case (HT\_OP): We are given

$$\frac{\Gamma \vdash V' : T_i^{\text{par}} \quad \Gamma, x : T_i^{\text{ari}} \vdash M' : \Sigma \triangleright T / A_i^{\text{ini}} \Rightarrow A_i^{\text{ini}}}{\Gamma \vdash \sigma_i(V'; x. M') : \Sigma \triangleright T / A_i^{\text{ini}} \Rightarrow A_i^{\text{fin}}}$$

for some  $V', x, M'$ , and  $i$  such that  $M = \sigma_i(V'; x. M')$  and  $A^{\text{fin}} = A_i^{\text{fin}}$ . By case analysis on  $A_i^{\text{ini}}$ .

Case  $\exists C_i^{\text{ini}}$ .  $A_i^{\text{ini}} = C_i^{\text{ini}}$ : By the definition, it suffices to show that

$$\Xi \parallel \Delta \vdash v_i^{\text{h}} \llbracket V' \rrbracket \lambda x, \bar{h}, k. \llbracket M' \rrbracket [\bar{v}^{\text{h}} \mid v^{\text{k}}] \bar{h} k : \llbracket A_i^{\text{fin}} \rrbracket$$

where  $|\bar{h}| = |C_i^{\text{ini}}. \Sigma|$ . Let  $C_i^{\text{ini}} = \Sigma' \triangleright T' / C'^{\text{ini}} \Rightarrow C'^{\text{fin}}$  for some  $\Sigma', T', C'^{\text{ini}}$ , and  $C'^{\text{fin}}$ . Let  $\Delta' = \Delta, x : \llbracket T_i^{\text{ari}} \rrbracket, \bar{h} : \Sigma', k : \llbracket T' \rrbracket \rightarrow \llbracket C'^{\text{ini}} \rrbracket$ . Because  $\llbracket \Gamma \rrbracket \preceq \Delta$ , we have  $\llbracket \Gamma \rrbracket, x : \llbracket T_i^{\text{ari}} \rrbracket \preceq \Delta'$ . By Lemma 6,  $\Xi \parallel \Delta' \vdash \bar{v}^{\text{h}} : \Sigma$  and  $\Xi \parallel \Delta' \vdash v^{\text{k}} : \llbracket T' \rrbracket \rightarrow \llbracket A_i^{\text{ini}} \rrbracket$ . Therefore, by the IHs,

- $\Xi \parallel \Delta \vdash \llbracket V' \rrbracket : \llbracket T_i^{\text{par}} \rrbracket$  and
- $\Xi \parallel \Delta' \vdash \llbracket M' \rrbracket [\bar{v}^{\text{h}} \mid v^{\text{k}}] : \llbracket C_i^{\text{ini}} \rrbracket$ .

By (T\_ABS), (T\_APP), (T\_VAR), (T\_LET), and (T\_RETURN),

$$\Xi \parallel \Delta \vdash \lambda x, \bar{h}, k. \llbracket M' \rrbracket [\bar{v}^{\text{h}} \mid v^{\text{k}}] \bar{h} k : \llbracket C_i^{\text{ini}} \rrbracket \rightarrow \llbracket C_i^{\text{ini}} \rrbracket .$$

The conclusion is derived as follows:

$$\begin{aligned} \mathcal{D} &= \frac{\Xi \parallel \Delta \vdash v_i^{\text{h}} : \llbracket T_i^{\text{par}} \rrbracket \rightarrow (\llbracket T_i^{\text{ari}} \rrbracket \rightarrow \llbracket A_i^{\text{ini}} \rrbracket) \rightarrow \llbracket A_i^{\text{fin}} \rrbracket \quad \Xi \parallel \Delta \vdash \llbracket V' \rrbracket : \llbracket T_i^{\text{par}} \rrbracket}{\Xi \parallel \Delta \vdash v_i^{\text{h}} \llbracket V' \rrbracket : (\llbracket T_i^{\text{ari}} \rrbracket \rightarrow \llbracket A_i^{\text{ini}} \rrbracket) \rightarrow \llbracket A_i^{\text{fin}} \rrbracket} \text{ (T_APP)} \\ &\frac{\mathcal{D} \quad \Xi \parallel \Delta \vdash \lambda x, \bar{h}, k. \llbracket M' \rrbracket [\bar{v}^{\text{h}} \mid v^{\text{k}}] \bar{h} k : \llbracket T_i^{\text{ari}} \rrbracket \rightarrow \llbracket C_i^{\text{ini}} \rrbracket \quad C_i^{\text{ini}} = A_i^{\text{ini}}}{\Xi \parallel \Delta \vdash v_i^{\text{h}} \llbracket V' \rrbracket \lambda x, \bar{h}, k. \llbracket M' \rrbracket [\bar{v}^{\text{h}} \mid v^{\text{k}}] \bar{h} k : \llbracket A_i^{\text{fin}} \rrbracket} \text{ (T_LET), (T_APP)} \end{aligned}$$

Case  $\exists T_i^{\text{ini}}$ .  $A_i^{\text{ini}} = T_i^{\text{ini}}$ : By the definition, it suffices to show that

$$\Xi \parallel \Delta \vdash v_i^{\text{h}} \llbracket V' \rrbracket \lambda x. \llbracket M' \rrbracket [\bar{v}^{\text{h}} \mid v^{\text{k}}] : \llbracket A_i^{\text{fin}} \rrbracket .$$

Because  $\llbracket \Gamma \rrbracket \preceq \Delta$ , we have  $\llbracket \Gamma \rrbracket, x : \llbracket T_i^{\text{ari}} \rrbracket \preceq \Delta, x : \llbracket T_i^{\text{ari}} \rrbracket$ . By Lemma 6,  $\Xi \parallel \Delta, x : \llbracket T_i^{\text{ari}} \rrbracket \vdash \bar{v}^{\text{h}} : \Sigma$  and  $\Xi \parallel \Delta, x : \llbracket T_i^{\text{ari}} \rrbracket \vdash v^{\text{k}} : \llbracket T' \rrbracket \rightarrow \llbracket A_i^{\text{ini}} \rrbracket$ . Therefore, by the IHs,

- $\Xi \parallel \Delta \vdash \llbracket V' \rrbracket : \llbracket T_i^{\text{par}} \rrbracket$  and
- $\Xi \parallel \Delta, x : \llbracket T_i^{\text{ari}} \rrbracket \vdash \llbracket M' \rrbracket [\bar{v}^{\text{h}} \mid v^{\text{k}}] : \llbracket A_i^{\text{ini}} \rrbracket$ .

By (T\_ABS),

$$\Xi \parallel \Delta \vdash \lambda x. \llbracket M' \rrbracket [\bar{v}^{\text{h}} \mid v^{\text{k}}] : \llbracket T_i^{\text{ari}} \rrbracket \rightarrow \llbracket A_i^{\text{ini}} \rrbracket .$$

The conclusion is derived as follows:

$$\begin{aligned} \mathcal{D} &= \frac{\Xi \parallel \Delta \vdash v_i^{\text{h}} : \llbracket T_i^{\text{par}} \rrbracket \rightarrow (\llbracket T_i^{\text{ari}} \rrbracket \rightarrow \llbracket A_i^{\text{ini}} \rrbracket) \rightarrow \llbracket A_i^{\text{fin}} \rrbracket \quad \Xi \parallel \Delta \vdash \llbracket V' \rrbracket : \llbracket T_i^{\text{par}} \rrbracket}{\Xi \parallel \Delta \vdash v_i^{\text{h}} \llbracket V' \rrbracket : (\llbracket T_i^{\text{ari}} \rrbracket \rightarrow \llbracket A_i^{\text{ini}} \rrbracket) \rightarrow \llbracket A_i^{\text{fin}} \rrbracket} \text{ (T_APP)} \\ &\frac{\mathcal{D} \quad \Xi \parallel \Delta \vdash \lambda x. \llbracket M' \rrbracket [\bar{v}^{\text{h}} \mid v^{\text{k}}] : \llbracket T_i^{\text{ari}} \rrbracket \rightarrow \llbracket A_i^{\text{ini}} \rrbracket}{\Xi \parallel \Delta \vdash v_i^{\text{h}} \llbracket V' \rrbracket \lambda x. \llbracket M' \rrbracket [\bar{v}^{\text{h}} \mid v^{\text{k}}] : \llbracket A_i^{\text{fin}} \rrbracket} \text{ (T_LET), (T_APP)} \end{aligned}$$

Case (HT\_HANDLE): We are given

$$\begin{aligned} H' &= \{\text{return } x \mapsto M_0\} \uplus \{\sigma'_j(x'_j; k'_j) \mapsto M'_j\}^{1 \leq j \leq m} \\ \Sigma' &= \{\sigma'_j : T_j^{\text{par}} \rightsquigarrow T_j^{\text{ari}} / C_j^{\text{ini}} \Rightarrow C_j^{\text{fin}}\}^{1 \leq j \leq m} \\ \Gamma \vdash M' : \Sigma' \triangleright T' / C^{\text{ini}} \Rightarrow C^{\text{fin}} \quad \Gamma, x : T' \vdash M_0 : C^{\text{ini}} \\ \forall j \in [1, m]. \Gamma, x'_j : T_j^{\text{par}}, k'_j : T_j^{\text{ari}} \rightarrow C_j^{\text{ini}} \vdash M'_j : C_j^{\text{fin}} \\ \hline \Gamma \vdash \text{with } H' \text{ handle } M' : \Sigma \triangleright T / A^{\text{ini}} \Rightarrow A^{\text{fin}} \end{aligned}$$

for some  $H', M', x, M_0, \sigma'_1, \dots, \sigma'_m, x'_1, \dots, x'_m, k'_1, \dots, k'_m, M'_1, \dots, M'_m, T_1^{\text{par}}, \dots, T_m^{\text{par}}, T_1^{\text{ari}}, \dots, T_m^{\text{ari}}, C_1^{\text{ini}}, \dots, C_m^{\text{ini}}$ , and  $C_1^{\text{fin}}, \dots, C_m^{\text{fin}}, \Sigma', T', C^{\text{ini}}$ , and  $C^{\text{fin}}$  such that  $M =$  with  $H'$  handle  $M'$  and  $C^{\text{fin}} = \Sigma \triangleright T / A^{\text{ini}} \Rightarrow A^{\text{fin}}$ . By the definition, it suffices to show that

$$\Xi \parallel \Delta \vdash \llbracket M' \rrbracket [\lambda x'_1, k'_1. \text{return} \llbracket M'_1 \rrbracket, \dots, \lambda x'_m, k'_m. \text{return} \llbracket M'_m \rrbracket \mid \lambda x. \text{return} \llbracket M_0 \rrbracket] \overline{v^h} v^k : \llbracket A^{\text{fin}} \rrbracket .$$

Because  $\llbracket \Gamma \rrbracket \preceq \Delta$ , we have  $\llbracket \Gamma \rrbracket, x : \llbracket T' \rrbracket \preceq \Delta, x : \llbracket T' \rrbracket$  and, for each  $j \in [1, m]$ ,  $\llbracket \Gamma \rrbracket, x'_j : \llbracket T_j^{\text{par}} \rrbracket, k'_j : \llbracket T_j^{\text{ari}} \rrbracket \rightarrow \llbracket C_j^{\text{ini}} \rrbracket \preceq \Delta, x'_j : \llbracket T_j^{\text{par}} \rrbracket, k'_j : \llbracket T_j^{\text{ari}} \rrbracket \rightarrow \llbracket C_j^{\text{ini}} \rrbracket$ . Therefore, by the IHs on the typing derivations of  $M_0, M'_1, \dots, M'_m$ ,

- $\Xi \parallel \Delta, x : \llbracket T' \rrbracket \vdash \llbracket M_0 \rrbracket : \llbracket C^{\text{ini}} \rrbracket$  and
- $\forall j \in [1, m]. \Xi \parallel \Delta, x'_j : \llbracket T_j^{\text{par}} \rrbracket, k'_j : \llbracket T_j^{\text{ari}} \rrbracket \rightarrow \llbracket C_j^{\text{ini}} \rrbracket \vdash \llbracket M'_j \rrbracket : \llbracket C_j^{\text{fin}} \rrbracket$ .

By (T\_ABS) and (T\_RETURN),

- $\Xi \parallel \Delta \vdash \lambda x. \text{return} \llbracket M_0 \rrbracket : \llbracket T' \rrbracket \rightarrow \llbracket C^{\text{ini}} \rrbracket$  and
- $\forall j \in [1, m]. \Xi \parallel \Delta \vdash \lambda x'_j, k'_j. \text{return} \llbracket M'_j \rrbracket : \llbracket T_j^{\text{par}} \rrbracket \rightarrow (\llbracket T_j^{\text{ari}} \rrbracket \rightarrow \llbracket C_j^{\text{ini}} \rrbracket) \rightarrow \llbracket C_j^{\text{fin}} \rrbracket$ .

Therefore,

$$\Xi \parallel \Delta \vdash \lambda x'_1, k'_1. \text{return} \llbracket M'_1 \rrbracket, \dots, \lambda x'_m, k'_m. \text{return} \llbracket M'_m \rrbracket : \Sigma' .$$

By the IH on the typing derivation of  $M'$ ,

$$\Xi \parallel \Delta \vdash \llbracket M' \rrbracket [\lambda x'_1, k'_1. \text{return} \llbracket M'_1 \rrbracket, \dots, \lambda x'_m, k'_m. \text{return} \llbracket M'_m \rrbracket \mid \lambda x. \text{return} \llbracket M_0 \rrbracket] : \llbracket C^{\text{fin}} \rrbracket .$$

Because  $C^{\text{fin}} = \Sigma \triangleright T / A^{\text{ini}} \Rightarrow A^{\text{fin}}$  and  $\Xi \parallel \Delta \vdash \overline{v^h} : \Sigma$  and  $\Xi \parallel \Delta \vdash v^k : \llbracket T \rrbracket \rightarrow \llbracket A^{\text{ini}} \rrbracket$ , we have the conclusion.

- Assume that  $\Gamma \vdash M : \Sigma \triangleright T / A^{\text{ini}} \Rightarrow A^{\text{fin}}$  is given. Let  $\overline{h}$  be a variable sequence such that  $|\overline{h}| = |\Sigma|$ . Then, by the definition of the CPS transformation, it suffices to show that  $\Xi \parallel \Delta, \overline{h} : \Sigma, k : \llbracket T \rrbracket \rightarrow \llbracket A^{\text{ini}} \rrbracket \vdash \llbracket M \rrbracket [\overline{h} \mid k] : \llbracket A^{\text{fin}} \rrbracket$ , which is shown by case (11).

□

### 3.4 Semantics Preservation

**Lemma 12** (Substitution is a Homomorphism). *For any  $V'$  and  $x$ , the following holds:*

1. For any  $M, \overline{v^h}$ , and  $v^k$ ,  $\llbracket M \rrbracket [\overline{v^h} \mid v^k] [\llbracket V' \rrbracket / x] = \llbracket M[V'/x] \rrbracket [\overline{v^h} [\llbracket V' \rrbracket / x] \mid v^k [\llbracket V' \rrbracket / x]]$ .
2. For any  $M$ ,  $\llbracket M \rrbracket [\llbracket V' \rrbracket / x] = \llbracket M[V'/x] \rrbracket$ .
3. For any  $V$ ,  $\llbracket V \rrbracket [\llbracket V' \rrbracket / x] = \llbracket V[V'/x] \rrbracket$ .

*Proof.* By mutual induction on  $M$  and  $V$ .

1. By case analysis on  $M$ .

Case  $\exists V. M = \text{return } V$ : The conclusion is shown as follows:

$$\begin{aligned} & \llbracket M \rrbracket [\overline{v^h} \mid v^k] [\llbracket V' \rrbracket / x] \\ &= \llbracket \text{return } V \rrbracket [\overline{v^h} \mid v^k] [\llbracket V' \rrbracket / x] \\ &= v^k [\llbracket V' \rrbracket / x] \llbracket V \rrbracket [\llbracket V' \rrbracket / x] \\ &= v^k [\llbracket V' \rrbracket / x] \llbracket V[V'/x] \rrbracket \quad (\text{by the IH}) \\ &= \llbracket \text{return } V[V'/x] \rrbracket [\overline{v^h} [\llbracket V' \rrbracket / x] \mid v^k [\llbracket V' \rrbracket / x]] \\ &= \llbracket M[V'/x] \rrbracket [\overline{v^h} [\llbracket V' \rrbracket / x] \mid v^k [\llbracket V' \rrbracket / x]] . \end{aligned}$$

Case  $\exists M_1, M_2, y. M = (\text{let } y = M_1 \text{ in } M_2)$ : Without loss of generality, we can assume that  $y \notin \text{fv}(V') \cup \{x\}$ .

Then, the conclusion is shown as follows:

$$\begin{aligned}
& \llbracket M \rrbracket[\overline{v^h} \mid v^k][\llbracket V' \rrbracket/x] \\
&= \llbracket \text{let } y = M_1 \text{ in } M_2 \rrbracket[\overline{v^h} \mid v^k][\llbracket V' \rrbracket/x] \\
&= \llbracket M_1 \rrbracket[\overline{v^h} \mid \lambda y. \llbracket M_2 \rrbracket[\overline{v^h} \mid v^k]][\llbracket V' \rrbracket/x] \\
&= \llbracket M_1[V'/x] \rrbracket[\overline{v^h}[\llbracket V' \rrbracket/x] \mid (\lambda y. \llbracket M_2 \rrbracket[\overline{v^h} \mid v^k])][\llbracket V' \rrbracket/x] \quad (\text{by the IH on } M_1) \\
&= \llbracket M_1[V'/x] \rrbracket[\overline{v^h}[\llbracket V' \rrbracket/x] \mid \lambda y. \llbracket M_2[V'/x] \rrbracket[\overline{v^h}[\llbracket V' \rrbracket/x] \mid v^k][\llbracket V' \rrbracket/x]] \quad (\text{by the IH on } M_2) \\
&= \llbracket \text{let } y = M_1[V'/x] \text{ in } M_2[V'/x] \rrbracket[\overline{v^h}[\llbracket V' \rrbracket/x] \mid v^k][\llbracket V' \rrbracket/x] \\
&= \llbracket M[V'/x] \rrbracket[\overline{v^h}[\llbracket V' \rrbracket/x] \mid v^k][\llbracket V' \rrbracket/x] .
\end{aligned}$$

Case  $\exists V_1, V_2. M = V_1 V_2$ : The conclusion is shown as follows:

$$\begin{aligned}
& \llbracket M \rrbracket[\overline{v^h} \mid v^k][\llbracket V' \rrbracket/x] \\
&= \llbracket V_1 V_2 \rrbracket[\overline{v^h} \mid v^k][\llbracket V' \rrbracket/x] \\
&= (\llbracket V_1 \rrbracket[\llbracket V_2 \rrbracket[\overline{v^h} \mid v^k]][\llbracket V' \rrbracket/x]) \\
&= \llbracket V_1[V'/x] \rrbracket[\llbracket V_2[V'/x] \rrbracket[\overline{v^h}[\llbracket V' \rrbracket/x] \mid v^k][\llbracket V' \rrbracket/x]] \quad (\text{by the IHs on } V_1 \text{ and } V_2) \\
&= \llbracket V_1[V'/x] V_2[V'/x] \rrbracket[\overline{v^h}[\llbracket V' \rrbracket/x] \mid v^k][\llbracket V' \rrbracket/x] \\
&= \llbracket M[V'/x] \rrbracket[\overline{v^h}[\llbracket V' \rrbracket/x] \mid v^k][\llbracket V' \rrbracket/x] .
\end{aligned}$$

Case  $\exists V, M_1, \dots, M_n. M = \text{case}(V; M_1, \dots, M_n)$ : The conclusion is shown as follows:

$$\begin{aligned}
& \llbracket M \rrbracket[\overline{v^h} \mid v^k][\llbracket V' \rrbracket/x] \\
&= \llbracket \text{case}(V; M_1, \dots, M_n) \rrbracket[\overline{v^h} \mid v^k][\llbracket V' \rrbracket/x] \\
&= (\text{case}(\llbracket V \rrbracket[\llbracket V' \rrbracket/x]; \llbracket M_1 \rrbracket[\overline{v^h} \mid v^k], \dots, \llbracket M_n \rrbracket[\overline{v^h} \mid v^k]))[\llbracket V' \rrbracket/x] \\
&= \text{case}(\llbracket V \rrbracket[\llbracket V' \rrbracket/x]; \llbracket M_1[V'/x] \rrbracket[\overline{v^h}[\llbracket V' \rrbracket/x] \mid v^k][\llbracket V' \rrbracket/x], \dots, \llbracket M_n[V'/x] \rrbracket[\overline{v^h}[\llbracket V' \rrbracket/x] \mid v^k][\llbracket V' \rrbracket/x]]) \\
&\quad (\text{by the IHs on } V, M_1, \dots, M_n) \\
&= \llbracket \text{case}(V[V'/x]; M_1[V'/x], \dots, M_n[V'/x]) \rrbracket[\overline{v^h}[\llbracket V' \rrbracket/x] \mid v^k][\llbracket V' \rrbracket/x] \\
&= \llbracket \text{case}(V; M_1, \dots, M_n)[V'/x] \rrbracket[\overline{v^h}[\llbracket V' \rrbracket/x] \mid v^k][\llbracket V' \rrbracket/x] \\
&= \llbracket M[V'/x] \rrbracket[\overline{v^h}[\llbracket V' \rrbracket/x] \mid v^k][\llbracket V' \rrbracket/x] .
\end{aligned}$$

Case  $\exists \sigma_i, V, y, M'. M = \sigma_i(V; y. M')$ : Without loss of generality, we can assume that  $y \notin \text{fv}(V') \cup \{x\}$ .

Furthermore, assume that  $\overline{v^h}$  includes a value  $v_i^h$  corresponding to  $\sigma_i$ . Then, the conclusion is shown as follows:

$$\begin{aligned}
& \llbracket M \rrbracket[\overline{v^h} \mid v^k][\llbracket V' \rrbracket/x] \\
&= \llbracket \sigma_i(V; y. M') \rrbracket[\overline{v^h} \mid v^k][\llbracket V' \rrbracket/x] \\
&= (v_i^h[\llbracket V \rrbracket \lambda y, \overline{h}, k. \llbracket M' \rrbracket[\overline{v^h} \mid v^k] \overline{h} k][\llbracket V' \rrbracket/x]) \\
&= v_i^h[\llbracket V' \rrbracket/x][\llbracket V \rrbracket[\llbracket V' \rrbracket/x] \lambda y, \overline{h}, k. \llbracket M' \rrbracket[\overline{v^h} \mid v^k] \overline{h} k] \\
&= v_i^h[\llbracket V' \rrbracket/x][\llbracket V[V'/x] \rrbracket \lambda y, \overline{h}, k. \llbracket M'[V'/x] \rrbracket[\overline{v^h}[\llbracket V' \rrbracket/x] \mid v^k][\llbracket V' \rrbracket/x] \overline{h} k] \quad (\text{by the IHs on } V \text{ and } M') \\
&= \llbracket \sigma_i(V[V'/x]; y. M'[V'/x]) \rrbracket[\overline{v^h}[\llbracket V' \rrbracket/x] \mid v^k][\llbracket V' \rrbracket/x] \\
&= \llbracket \sigma_i(V; y. M')[V'/x] \rrbracket[\overline{v^h}[\llbracket V' \rrbracket/x] \mid v^k][\llbracket V' \rrbracket/x] \\
&= \llbracket M[V'/x] \rrbracket[\overline{v^h}[\llbracket V' \rrbracket/x] \mid v^k][\llbracket V' \rrbracket/x]
\end{aligned}$$

or

$$\begin{aligned}
& \llbracket M \rrbracket[\overline{v^h} \mid v^k][\llbracket V' \rrbracket/x] \\
&= \llbracket \sigma_i(V; y. M') \rrbracket[\overline{v^h} \mid v^k][\llbracket V' \rrbracket/x] \\
&= (v_i^h[\llbracket V \rrbracket \lambda y. \llbracket M' \rrbracket[\overline{v^h} \mid v^k] \overline{h} k][\llbracket V' \rrbracket/x]) \\
&= v_i^h[\llbracket V' \rrbracket/x][\llbracket V \rrbracket[\llbracket V' \rrbracket/x] \lambda y. \llbracket M' \rrbracket[\overline{v^h} \mid v^k] \overline{h} k] \\
&= v_i^h[\llbracket V' \rrbracket/x][\llbracket V[V'/x] \rrbracket \lambda y. \llbracket M'[V'/x] \rrbracket[\overline{v^h}[\llbracket V' \rrbracket/x] \mid v^k][\llbracket V' \rrbracket/x]] \quad (\text{by the IHs on } V \text{ and } M') \\
&= \llbracket \sigma_i(V[V'/x]; y. M'[V'/x]) \rrbracket[\overline{v^h}[\llbracket V' \rrbracket/x] \mid v^k][\llbracket V' \rrbracket/x] \\
&= \llbracket \sigma_i(V; y. M')[V'/x] \rrbracket[\overline{v^h}[\llbracket V' \rrbracket/x] \mid v^k][\llbracket V' \rrbracket/x] \\
&= \llbracket M[V'/x] \rrbracket[\overline{v^h}[\llbracket V' \rrbracket/x] \mid v^k][\llbracket V' \rrbracket/x] .
\end{aligned}$$

Note that the value substitution does not influence the operation signature used in typing  $M$ .

Case  $\exists H, M'$ .  $M = \text{with } H \text{ handle } M'$ : Let  $H = \{\text{return } y \mapsto M''\} \uplus \{\sigma(y_i; k_i) \mapsto M_i\}^{1 \leq i \leq n}$  for some  $y, M'', y_1, \dots, y_n, k_1, \dots, k_n, M_1, \dots, M_n$ . Without loss of generality, we can assume that  $y, y_1, \dots, y_n, k_1, \dots, k_n$  are distinct from the variables in  $\text{fv}(V') \cup \{x\}$ . Then, the conclusion is shown as follows:

$$\begin{aligned}
& \llbracket M \rrbracket[\overline{v^h} \mid v^k][\llbracket V' \rrbracket/x] \\
= & \llbracket \text{with } H \text{ handle } M' \rrbracket[\overline{v^h} \mid v^k][\llbracket V' \rrbracket/x] \\
= & \langle \llbracket M' \rrbracket[\lambda y_1, k_1. \text{return } \llbracket M_1 \rrbracket, \dots, \lambda y_n, k_n. \text{return } \llbracket M_n \rrbracket \mid \lambda y. \text{return } \llbracket M'' \rrbracket] \overline{v^h} v^k \rangle[\llbracket V' \rrbracket/x] \\
= & \llbracket M' \llbracket V' \rrbracket/x \rrbracket[\overline{V_1}, \dots, \overline{V_n} \mid \lambda y. \text{return } \llbracket M'' \llbracket V' \rrbracket/x \rrbracket \rrbracket] \overline{v^h}[\llbracket V' \rrbracket/x] v^k[\llbracket V' \rrbracket/x] \\
& \quad (\text{where } V_i \stackrel{\text{def}}{=} \lambda y_i, k_i. \text{return } \llbracket M_i \llbracket V' \rrbracket/x \rrbracket \rrbracket, \text{ by the IHs on } M', M'', M_1, \dots, M_n) \\
= & \llbracket (\text{with } H \text{ handle } M') \llbracket V' \rrbracket/x \rrbracket[\overline{v^h}[\llbracket V' \rrbracket/x] \mid v^k[\llbracket V' \rrbracket/x]] \\
= & \llbracket M \llbracket V' \rrbracket/x \rrbracket[\overline{v^h}[\llbracket V' \rrbracket/x] \mid v^k[\llbracket V' \rrbracket/x]] .
\end{aligned}$$

2. By case (1).

3. By induction on  $V$ .

Case  $\exists y$ .  $V = y$ : Obvious.

Case  $\exists c$ .  $V = c$ : Obvious.

Case  $\exists \underline{n}$ .  $V = \underline{n}$ : Obvious.

Case  $\exists y, M$ .  $V = \lambda y. M$ : By the IH.

Case  $\exists y, V_0$ .  $V = \text{fix } y. V_0$ : By the IH.

□

**Lemma 13** (Handler and Continuation Substitution). *If  $x \notin \text{fv}(M)$ , then*

$$\llbracket M \rrbracket[\overline{v^h} \mid v^k][v/x] = \llbracket M \rrbracket[\overline{v^h[v/x]} \mid v^k[v/x]] .$$

*Proof.* By induction on  $M$ .

Case  $\exists V'$ .  $M = \text{return } V'$ : The conclusion is shown as follows:

$$\begin{aligned}
& \llbracket M \rrbracket[\overline{v^h} \mid v^k][v/x] \\
= & \llbracket \text{return } V' \rrbracket[\overline{v^h} \mid v^k][v/x] \\
= & v^k[v/x] \llbracket V' \rrbracket[v/x] \\
= & v^k[v/x] \llbracket V' \rrbracket \quad (\text{Note that } x \text{ does not occur free in } \llbracket V' \rrbracket) \\
= & \llbracket \text{return } V' \rrbracket[\overline{v^h[v/x]} \mid v^k[v/x]] \\
= & \llbracket M \rrbracket[\overline{v^h[v/x]} \mid v^k[v/x]] .
\end{aligned}$$

Case  $\exists M_1, M_2, y$ .  $M = (\text{let } y = M_1 \text{ in } M_2)$ : Without loss of generality, we can assume that  $y \notin \text{fv}(v) \cup \{x\}$ . Then, the conclusion is shown as follows:

$$\begin{aligned}
& \llbracket M \rrbracket[\overline{v^h} \mid v^k][v/x] \\
= & \llbracket \text{let } y = M_1 \text{ in } M_2 \rrbracket[\overline{v^h} \mid v^k][v/x] \\
= & \llbracket M_1 \rrbracket[\overline{v^h} \mid \lambda y. \llbracket M_2 \rrbracket[\overline{v^h} \mid v^k]][v/x] \\
= & \llbracket M_1 \rrbracket[\overline{v^h[v/x]} \mid (\lambda y. \llbracket M_2 \rrbracket[\overline{v^h} \mid v^k])[v/x]] \quad (\text{by the IH on } M_1) \\
= & \llbracket M_1 \rrbracket[\overline{v^h[v/x]} \mid \lambda y. \llbracket M_2 \rrbracket[\overline{v^h} \mid v^k][v/x]] \\
= & \llbracket M_1 \rrbracket[\overline{v^h[v/x]} \mid \lambda y. \llbracket M_2 \rrbracket[\overline{v^h[v/x]} \mid v^k[v/x]]] \quad (\text{by the IH on } M_2) \\
= & \llbracket \text{let } y = M_1 \text{ in } M_2 \rrbracket[\overline{v^h[v/x]} \mid v^k[v/x]] \\
= & \llbracket M \rrbracket[\overline{v^h[v/x]} \mid v^k[v/x]] .
\end{aligned}$$

Case  $\exists V_1, V_2. M = V_1 V_2$ : The conclusion is shown as follows:

$$\begin{aligned}
& \llbracket M \rrbracket[\overline{v^h} \mid v^k][v/x] \\
&= \llbracket V_1 V_2 \rrbracket[\overline{v^h} \mid v^k][v/x] \\
&= (\llbracket V_1 \rrbracket \llbracket V_2 \rrbracket \overline{v^h v^k})[v/x] \\
&= \llbracket V_1 \rrbracket \llbracket V_2 \rrbracket \overline{v^h[v/x] v^k[v/x]} \quad (\text{Note that } x \text{ does not occur free in } \llbracket V_1 \rrbracket \text{ nor } \llbracket V_2 \rrbracket) \\
&= \llbracket V_1 V_2 \rrbracket[\overline{v^h[v/x] v^k[v/x]}] \\
&= \llbracket M \rrbracket[\overline{v^h[v/x] v^k[v/x]}] .
\end{aligned}$$

Case  $\exists V', M_1, \dots, M_n. M = \text{case}(V'; M_1, \dots, M_n)$ : The conclusion is shown as follows:

$$\begin{aligned}
& \llbracket M \rrbracket[\overline{v^h} \mid v^k][v/x] \\
&= \llbracket \text{case}(V'; M_1, \dots, M_n) \rrbracket[\overline{v^h} \mid v^k][v/x] \\
&= (\text{case}(\llbracket V' \rrbracket; \llbracket M_1 \rrbracket[\overline{v^h} \mid v^k], \dots, \llbracket M_n \rrbracket[\overline{v^h} \mid v^k]))[v/x] \\
&= \text{case}(\llbracket V' \rrbracket[v/x]; \llbracket M_1 \rrbracket[\overline{v^h} \mid v^k][v/x], \dots, \llbracket M_n \rrbracket[\overline{v^h} \mid v^k][v/x]) \\
&= \text{case}(\llbracket V' \rrbracket; \llbracket M_1 \rrbracket[\overline{v^h[v/x] v^k[v/x]}], \dots, \llbracket M_n \rrbracket[\overline{v^h[v/x] v^k[v/x]}]) \\
&\quad (\text{by the IHs on } M_1, \dots, M_n; \text{ note that } x \text{ does not occur free in } \llbracket V' \rrbracket) \\
&= \llbracket \text{case}(V'; M_1, \dots, M_n) \rrbracket[\overline{v^h[v/x] v^k[v/x]}] \\
&= \llbracket M \rrbracket[\overline{v^h[v/x] v^k[v/x]}] .
\end{aligned}$$

Case  $\exists \sigma_i, V', y, M'. M = \sigma_i(V'; y. M')$ : Without loss of generality, we can assume that  $y \notin \text{fv}(v) \cup \{x\}$ . Furthermore, assume that  $\overline{v^h}$  includes a value  $v_i^h$  corresponding to  $\sigma_i$ . Then, the conclusion is shown as follows:

$$\begin{aligned}
& \llbracket M \rrbracket[\overline{v^h} \mid v^k][v/x] \\
&= \llbracket \sigma_i(V'; y. M') \rrbracket[\overline{v^h} \mid v^k][v/x] \\
&= (v_i^h \llbracket V' \rrbracket \lambda y. \overline{h}, k. \llbracket M' \rrbracket[\overline{v^h} \mid v^k] \overline{h} k)[v/x] \\
&= v_i^h[v/x] \llbracket V' \rrbracket[v/x] \lambda y. \overline{h}, k. \llbracket M' \rrbracket[\overline{v^h} \mid v^k][v/x] \overline{h} k \\
&= v_i^h[v/x] \llbracket V' \rrbracket \lambda y. \overline{h}, k. \llbracket M' \rrbracket[\overline{v^h[v/x] v^k[v/x]}] \overline{h} k \quad (\text{by the IH on } M'; \text{ note that } x \text{ does not occur free in } \llbracket V' \rrbracket) \\
&= \llbracket \sigma_i(V'; y. M') \rrbracket[\overline{v^h[v/x] v^k[v/x]}] \\
&= \llbracket M \rrbracket[\overline{v^h[v/x] v^k[v/x]}]
\end{aligned}$$

or

$$\begin{aligned}
& \llbracket M \rrbracket[\overline{v^h} \mid v^k][v/x] \\
&= \llbracket \sigma_i(V'; y. M') \rrbracket[\overline{v^h} \mid v^k][v/x] \\
&= (v_i^h \llbracket V' \rrbracket \lambda y. \llbracket M' \rrbracket[\overline{v^h} \mid v^k])[v/x] \\
&= v_i^h[v/x] \llbracket V' \rrbracket[v/x] \lambda y. \llbracket M' \rrbracket[\overline{v^h} \mid v^k][v/x] \\
&= v_i^h[v/x] \llbracket V' \rrbracket \lambda y. \llbracket M' \rrbracket[\overline{v^h[v/x] v^k[v/x]}] \quad (\text{by the IH on } M'; \text{ note that } x \text{ does not occur free in } \llbracket V' \rrbracket) \\
&= \llbracket \sigma_i(V'; y. M') \rrbracket[\overline{v^h[v/x] v^k[v/x]}] \\
&= \llbracket M \rrbracket[\overline{v^h[v/x] v^k[v/x]}] .
\end{aligned}$$

Case  $\exists H, M'. M = \text{with } H \text{ handle } M'$ : Let  $H = \{\text{return } y \mapsto M''\} \uplus \{\sigma(y_i; k_i) \mapsto M_i\}^{1 \leq i \leq n}$  for some  $y, M'', y_1, \dots, y_n, k_1, \dots, k_n, M_1, \dots, M_n$ . Without loss of generality, we can assume that  $y, y_1, \dots, y_n, k_1, \dots, k_n$  are distinct from the variables in  $\text{fv}(v) \cup \{x\}$ . Then, the conclusion is shown as follows:

$$\begin{aligned}
& \llbracket M \rrbracket[\overline{v^h} \mid v^k][v/x] \\
&= \llbracket \text{with } H \text{ handle } M' \rrbracket[\overline{v^h} \mid v^k][v/x] \\
&= (\llbracket M' \rrbracket[\lambda y_1, k_1. \text{return } \llbracket M_1 \rrbracket, \dots, \lambda y_n, k_n. \text{return } \llbracket M_n \rrbracket \mid \lambda y. \text{return } \llbracket M'' \rrbracket] \overline{v^h v^k})[v/x] \\
&= \llbracket M' \rrbracket[\lambda y_1, k_1. \text{return } \llbracket M_1 \rrbracket, \dots, \lambda y_n, k_n. \text{return } \llbracket M_n \rrbracket \mid \lambda y. \text{return } \llbracket M'' \rrbracket] \overline{v^h[v/x] v^k[v/x]} \\
&= \quad (\text{by the IH on } M'; \text{ note that } x \text{ does not occur free in } M_1, \dots, M_n, M'') \\
&= \llbracket (\text{with } H \text{ handle } M') \rrbracket[\overline{v^h[v/x] v^k[v/x]}] \\
&= \llbracket M \rrbracket[\overline{v^h[v/x] v^k[v/x]}] .
\end{aligned}$$

□

**Lemma 14** (Simulation up to Reduction). *Assume that  $\Gamma \vdash M : \Sigma \triangleright T / A^{\text{ini}} \Rightarrow A^{\text{fin}}$ . If  $M \longrightarrow M'$ , then, for any  $\bar{v}^{\text{h}}$  and  $v^{\text{k}}$  such that  $|\bar{v}^{\text{h}}| = |\Sigma|$ , either of the following holds:*

- $M' \longrightarrow^* \sigma(V_0; x. M_0)$  and  $\llbracket M \rrbracket[\bar{v}^{\text{h}} | v^{\text{k}}] = \llbracket \sigma(V_0; x. M_0) \rrbracket[\bar{v}^{\text{h}} | v^{\text{k}}]$  for some  $\sigma$ ,  $V_0$ ,  $x$ , and  $M_0$ ; or
- $M' \longrightarrow^* M''$  and  $\llbracket M \rrbracket[\bar{v}^{\text{h}} | v^{\text{k}}] \longrightarrow^+ \llbracket M'' \rrbracket[\bar{v}^{\text{h}} | v^{\text{k}}]$  for some  $M''$ .

*Proof.* By case analysis on the evaluation rule applied to derive  $M \longrightarrow M'$ .

Case (HE\_BETA): We are given

$$(\lambda x. M_1) V_2 \longrightarrow M_1[V_2/x]$$

for some  $x$ ,  $M_1$ , and  $V_2$  such that  $M = (\lambda x. M_1) V_2$  and  $M' = M_1[V_2/x]$ . Because  $\Gamma \vdash M : \Sigma \triangleright T / A^{\text{ini}} \Rightarrow A^{\text{fin}}$ , we have the following derivation for some  $T'$ :

$$\frac{\frac{\Gamma, x : T' \vdash M_1 : \Sigma \triangleright T / A^{\text{ini}} \Rightarrow A^{\text{fin}}}{\Gamma \vdash \lambda x. M_1 : T' \rightarrow \Sigma \triangleright T / A^{\text{ini}} \Rightarrow A^{\text{fin}}} \text{ (HT\_ABS)}}{\Gamma \vdash (\lambda x. M_1) V_2 : \Sigma \triangleright T / A^{\text{ini}} \Rightarrow A^{\text{fin}}} \Gamma \vdash V_2 : T' \text{ (HT\_APP)}$$

Therefore,  $\llbracket M_1 \rrbracket$  can take  $\bar{v}^{\text{h}}$ . Then, the conclusion is shown as follows (here we choose the second disjunct of the conclusion and take  $M' = M_1[V_2/x]$  as  $M''$ ):

$$\begin{aligned} \llbracket M \rrbracket[\bar{v}^{\text{h}} | v^{\text{k}}] &= \llbracket (\lambda x. M_1) V_2 \rrbracket[\bar{v}^{\text{h}} | v^{\text{k}}] \\ &= \llbracket \lambda x. M_1 \rrbracket \llbracket V_2 \rrbracket \bar{v}^{\text{h}} v^{\text{k}} \\ &= (\lambda x. \text{return } \llbracket M_1 \rrbracket) \llbracket V_2 \rrbracket \bar{v}^{\text{h}} v^{\text{k}} \\ &= (\lambda x, \bar{h}, k. \llbracket M_1 \rrbracket[\bar{h} | k]) \llbracket V_2 \rrbracket \bar{v}^{\text{h}} v^{\text{k}} \\ &\longrightarrow^+ \llbracket M_1 \rrbracket[\bar{h} | k] \llbracket \llbracket V_2 \rrbracket / x \rrbracket[\bar{v}^{\text{h}} / \bar{h}] [v^{\text{k}} / k] \\ &= \llbracket M_1[V_2/x] \rrbracket[\bar{h} | k] [v^{\text{h}} / \bar{h}] [v^{\text{k}} / k] \quad \text{(by Lemma 12)} \\ &= \llbracket M_1[V_2/x] \rrbracket[\bar{v}^{\text{h}} | v^{\text{k}}] \quad \text{(by Lemma 13)} . \end{aligned}$$

Case (HE\_FIX): We are given

$$(\text{fix } x. V_1) V_2 \longrightarrow V_1[\text{fix } x. V_1/x] V_2$$

for some  $x$ ,  $V_1$ , and  $V_2$  such that  $M = (\text{fix } x. V_1) V_2$  and  $M' = V_1[\text{fix } x. V_1/x] V_2$ . The conclusion is shown as follows (here we choose the second disjunct of the conclusion and take  $M' = V_1[\text{fix } x. V_1/x] V_2$  as  $M''$ ):

$$\begin{aligned} \llbracket M \rrbracket[\bar{v}^{\text{h}} | v^{\text{k}}] &= \llbracket (\text{fix } x. V_1) V_2 \rrbracket[\bar{v}^{\text{h}} | v^{\text{k}}] \\ &= \llbracket \text{fix } x. V_1 \rrbracket \llbracket V_2 \rrbracket \bar{v}^{\text{h}} v^{\text{k}} \\ &= (\text{fix } x. \llbracket V_1 \rrbracket) \llbracket V_2 \rrbracket \bar{v}^{\text{h}} v^{\text{k}} \\ &\longrightarrow \llbracket V_1 \rrbracket[\text{fix } x. \llbracket V_1 \rrbracket / x] \llbracket V_2 \rrbracket \bar{v}^{\text{h}} v^{\text{k}} \\ &= \llbracket V_1 \rrbracket[\llbracket \text{fix } x. V_1 \rrbracket / x] \llbracket V_2 \rrbracket \bar{v}^{\text{h}} v^{\text{k}} \\ &= \llbracket V_1[\text{fix } x. V_1/x] \rrbracket \llbracket V_2 \rrbracket \bar{v}^{\text{h}} v^{\text{k}} \quad \text{(by Lemma 12)} \\ &= \llbracket V_1[\text{fix } x. V_1/x] V_2 \rrbracket[\bar{v}^{\text{h}} | v^{\text{k}}] . \end{aligned}$$

Case (HE\_CASE): We are given

$$\text{case}(i; M_1, \dots, M_n) \longrightarrow M_i$$

for some  $i$ ,  $M_1, \dots, M_n$  such that  $0 < i \leq n$ ,  $M = \text{case}(i; M_1, \dots, M_n)$  and  $M' = M_i$ . The conclusion is shown as follows (here we choose the second disjunct of the conclusion and take  $M' = M_i$  as  $M''$ ):

$$\begin{aligned} \llbracket M \rrbracket[\bar{v}^{\text{h}} | v^{\text{k}}] &= \llbracket \text{case}(i; M_1, \dots, M_n) \rrbracket[\bar{v}^{\text{h}} | v^{\text{k}}] \\ &= \text{case}(\llbracket i \rrbracket; \llbracket M_1 \rrbracket[\bar{v}^{\text{h}} | v^{\text{k}}], \dots, \llbracket M_n \rrbracket[\bar{v}^{\text{h}} | v^{\text{k}}]) \\ &= \text{case}(i; \llbracket M_1 \rrbracket[\bar{v}^{\text{h}} | v^{\text{k}}], \dots, \llbracket M_n \rrbracket[\bar{v}^{\text{h}} | v^{\text{k}}]) \\ &\longrightarrow \llbracket M_i \rrbracket[\bar{v}^{\text{h}} | v^{\text{k}}] . \end{aligned}$$

Case (HE\_LETE): We are given

$$\frac{M_1 \longrightarrow M'_1}{\text{let } x = M_1 \text{ in } M_2 \longrightarrow \text{let } x = M'_1 \text{ in } M_2}$$

for some  $x$ ,  $M_1$ ,  $M_2$ , and  $M'_1$  such that  $M = (\text{let } x = M_1 \text{ in } M_2)$  and  $M' = (\text{let } x = M'_1 \text{ in } M_2)$ . Because  $\Gamma \vdash M : \Sigma \triangleright T / A^{\text{ini}} \Rightarrow A^{\text{fin}}$ , we have the following derivation for some  $T_1$  and  $A$ :

$$\frac{\Gamma \vdash M_1 : \Sigma \triangleright T_1 / A \Rightarrow A^{\text{fin}} \quad \Gamma, x : T_1 \vdash M_2 : \Sigma \triangleright T / A^{\text{ini}} \Rightarrow A}{\Gamma \vdash \text{let } x = M_1 \text{ in } M_2 : \Sigma \triangleright T / A^{\text{ini}} \Rightarrow A^{\text{fin}}} \text{ (HT\_LETE)}$$

By case analysis on the result of the IH on  $M_1$ .

Case  $\forall \overline{v_0^h}, v_0^k. |\overline{v_0^h}| = |\Sigma| \implies \exists \sigma, V_0, y, M_0. M'_1 \longrightarrow^* \sigma(V_0; y. M_0) \wedge \llbracket M_1 \rrbracket[\overline{v_0^h} | v_0^k] = \llbracket \sigma(V_0; y. M_0) \rrbracket[\overline{v_0^h} | v_0^k]$ : By the IH,

- $M'_1 \longrightarrow^* \sigma(V_0; y. M_0)$  and
- $\llbracket M_1 \rrbracket[\overline{v^h} | \lambda x. \llbracket M_2 \rrbracket[\overline{v^h} | v^k]] = \llbracket \sigma(V_0; y. M_0) \rrbracket[\overline{v^h} | \lambda x. \llbracket M_2 \rrbracket[\overline{v^h} | v^k]]$

for some  $V_0, y$ , and  $M_0$ . Without loss of generality, we can assume that  $y \notin \text{fv}(M_2)$ . By (HE\_LETE) and (HE\_LETOP),

$$M' = (\text{let } x = M'_1 \text{ in } M_2) \longrightarrow^* (\text{let } x = \sigma(V_0; y. M_0) \text{ in } M_2) \longrightarrow \sigma(V_0; y. \text{let } x = M_0 \text{ in } M_2).$$

By Lemma 5,  $\Gamma \vdash \sigma(V_0; y. M_0) : \Sigma \triangleright T_1 / A \Rightarrow A^{\text{fin}}$ . By its inversion,  $\sigma$  is included in  $\Sigma$ . Therefore,  $\overline{v^h}$  includes a value  $v_i^h$  corresponding to  $\sigma$ . Then, the conclusion is shown as follows (here we choose the first disjunct of the conclusion): if  $\sigma_i : T_i^{\text{par}} \rightsquigarrow T_i^{\text{ari}} / C_i^{\text{ini}} \Rightarrow A_i^{\text{fin}} \in \Sigma$  for some  $T_i^{\text{par}}$ ,  $T_i^{\text{ari}}$ ,  $C_i^{\text{ini}}$ , and  $A_i^{\text{fin}}$ , then

$$\begin{aligned} \llbracket M \rrbracket[\overline{v^h} | v^k] &= \llbracket \text{let } x = M_1 \text{ in } M_2 \rrbracket[\overline{v^h} | v^k] \\ &= \llbracket M_1 \rrbracket[\overline{v^h} | \lambda x. \llbracket M_2 \rrbracket[\overline{v^h} | v^k]] \\ &= \llbracket \sigma(V_0; y. M_0) \rrbracket[\overline{v^h} | \lambda x. \llbracket M_2 \rrbracket[\overline{v^h} | v^k]] && \text{(by the IH)} \\ &= v_i^h \llbracket V_0 \rrbracket \lambda y, \overline{h}, k. \llbracket M_0 \rrbracket[\overline{v^h} | \lambda x. \llbracket M_2 \rrbracket[\overline{v^h} | v^k]] \overline{h} k \\ &= v_i^h \llbracket V_0 \rrbracket \lambda y, \overline{h}, k. \llbracket \text{let } x = M_0 \text{ in } M_2 \rrbracket[\overline{v^h} | v^k] \overline{h} k \\ &= \llbracket \sigma(V_0; y. \text{let } x = M_0 \text{ in } M_2) \rrbracket[\overline{v^h} | v^k]; \end{aligned}$$

otherwise, if  $\sigma_i : T_i^{\text{par}} \rightsquigarrow T_i^{\text{ari}} / T_i^{\text{ini}} \Rightarrow A_i^{\text{fin}} \in \Sigma$  for some  $T_i^{\text{par}}$ ,  $T_i^{\text{ari}}$ ,  $T_i^{\text{ini}}$ , and  $A_i^{\text{fin}}$ , then

$$\begin{aligned} \llbracket M \rrbracket[\overline{v^h} | v^k] &= \llbracket \text{let } x = M_1 \text{ in } M_2 \rrbracket[\overline{v^h} | v^k] \\ &= \llbracket M_1 \rrbracket[\overline{v^h} | \lambda x. \llbracket M_2 \rrbracket[\overline{v^h} | v^k]] \\ &= \llbracket \sigma(V_0; y. M_0) \rrbracket[\overline{v^h} | \lambda x. \llbracket M_2 \rrbracket[\overline{v^h} | v^k]] && \text{(by the IH)} \\ &= v_i^h \llbracket V_0 \rrbracket \lambda y. \llbracket M_0 \rrbracket[\overline{v^h} | \lambda x. \llbracket M_2 \rrbracket[\overline{v^h} | v^k]] \\ &= v_i^h \llbracket V_0 \rrbracket \lambda y. \llbracket \text{let } x = M_0 \text{ in } M_2 \rrbracket[\overline{v^h} | v^k] \\ &= \llbracket \sigma(V_0; y. \text{let } x = M_0 \text{ in } M_2) \rrbracket[\overline{v^h} | v^k]. \end{aligned}$$

Case  $\forall \overline{v_0^h}, v_0^k. |\overline{v_0^h}| = |\Sigma| \implies \exists M'_1. M'_1 \longrightarrow^* M'_1 \wedge \llbracket M_1 \rrbracket[\overline{v_0^h} | v_0^k] \longrightarrow^+ \llbracket M'_1 \rrbracket[\overline{v_0^h} | v_0^k]$ : By the IH,

- $M'_1 \longrightarrow^* M'_1$  and
- $\llbracket M_1 \rrbracket[\overline{v^h} | \lambda x. \llbracket M_2 \rrbracket[\overline{v^h} | v^k]] \longrightarrow^+ \llbracket M'_1 \rrbracket[\overline{v^h} | \lambda x. \llbracket M_2 \rrbracket[\overline{v^h} | v^k]]$

for some  $M'_1$ . By (HE\_LETE),

$$M' = (\text{let } x = M'_1 \text{ in } M_2) \longrightarrow^* (\text{let } x = M'_1 \text{ in } M_2).$$

Therefore, the conclusion is shown as follows (here we choose the second disjunct of the conclusion and take  $\text{let } x = M'_1 \text{ in } M_2$  as  $M''$ ):

$$\begin{aligned} \llbracket M \rrbracket[\overline{v^h} | v^k] &= \llbracket \text{let } x = M_1 \text{ in } M_2 \rrbracket[\overline{v^h} | v^k] \\ &= \llbracket M_1 \rrbracket[\overline{v^h} | \lambda x. \llbracket M_2 \rrbracket[\overline{v^h} | v^k]] \\ &\longrightarrow^+ \llbracket M'_1 \rrbracket[\overline{v^h} | \lambda x. \llbracket M_2 \rrbracket[\overline{v^h} | v^k]] && \text{(by the IH)} \\ &= \llbracket \text{let } x = M'_1 \text{ in } M_2 \rrbracket[\overline{v^h} | v^k]. \end{aligned}$$



Case (HE\_LETV): We are given

$$\text{let } x = \text{return } V_1 \text{ in } M_2 \longrightarrow M_2[V_1/x]$$

for some  $x$ ,  $V_1$ , and  $M_2$  such that  $M = (\text{let } x = \text{return } V_1 \text{ in } M_2)$  and  $M' = M_2[V_1/x]$ . Without loss of generality, we can assume that  $x \notin fv(\overline{v^h}) \cup fv(v^k)$ . Then, the conclusion is shown as follows (here we choose the second disjunct of the conclusion and take  $M' = M_2[V_1/x]$  as  $M''$ ):

$$\begin{aligned} \llbracket M \rrbracket[\overline{v^h} \mid v^k] &= \llbracket \text{let } x = \text{return } V_1 \text{ in } M_2 \rrbracket[\overline{v^h} \mid v^k] \\ &= \llbracket \text{return } V_1 \rrbracket[\overline{v^h} \mid \lambda x. \llbracket M_2 \rrbracket[\overline{v^h} \mid v^k]] \\ &= (\lambda x. \llbracket M_2 \rrbracket[\overline{v^h} \mid v^k]) \llbracket V_1 \rrbracket \\ &\longrightarrow \llbracket M_2 \rrbracket[\overline{v^h} \mid v^k] \llbracket \llbracket V_1 \rrbracket / x \rrbracket \\ &= \llbracket M_2[V_1/x] \rrbracket[\overline{v^h} \mid v^k] \quad (\text{by Lemma 12; note that } x \text{ does not occur free in } \overline{v^h} \text{ and } v^k). \end{aligned}$$

Case (HE\_LETOP): We are given

$$\text{let } x = \sigma(V_1; y. M_1) \text{ in } M_2 \longrightarrow \sigma(V_1; y. \text{let } x = M_1 \text{ in } M_2)$$

for some  $x$ ,  $y$ ,  $\sigma$ ,  $V_1$ ,  $M_1$ , and  $M_2$  such that  $y \notin fv(M_2)$  and  $M = (\text{let } x = \sigma(V_1; y. M_1) \text{ in } M_2)$  and  $M' = \sigma(V_1; y. \text{let } x = M_1 \text{ in } M_2)$ . Without loss of generality, we can assume that  $y \notin fv(\overline{v^h}) \cup fv(v^k)$ . Because  $\Gamma \vdash M : \Sigma \triangleright T / A^{\text{ini}} \Rightarrow A^{\text{fin}}$ , its inversion implies that  $\sigma$  is included in  $\Sigma$ . Therefore,  $\overline{v^h}$  includes a value  $v_i^h$  corresponding to  $\sigma$ . Then, the conclusion is shown as follows (here we choose the first disjunct of the conclusion): if  $\sigma : T_i^{\text{par}} \rightsquigarrow T_i^{\text{ari}} / C_i^{\text{ini}} \Rightarrow A_i^{\text{fin}} \in \Sigma$  for some  $T_i^{\text{par}}$ ,  $T_i^{\text{ari}}$ ,  $C_i^{\text{ini}}$ , and  $A_i^{\text{fin}}$ , then

$$\begin{aligned} \llbracket M \rrbracket[\overline{v^h} \mid v^k] &= \llbracket \text{let } x = \sigma(V_1; y. M_1) \text{ in } M_2 \rrbracket[\overline{v^h} \mid v^k] \\ &= \llbracket \sigma(V_1; y. M_1) \rrbracket[\overline{v^h} \mid \lambda x. \llbracket M_2 \rrbracket[\overline{v^h} \mid v^k]] \\ &= v_i^h \llbracket V_1 \rrbracket (\lambda y. \overline{h}, k. \llbracket M_1 \rrbracket[\overline{v^h} \mid \lambda x. \llbracket M_2 \rrbracket[\overline{v^h} \mid v^k]] \overline{h} k) \\ &= v_i^h \llbracket V_1 \rrbracket (\lambda y. \overline{h}, k. \llbracket \text{let } x = M_1 \text{ in } M_2 \rrbracket[\overline{v^h} \mid v^k] \overline{h} k) \\ &= \llbracket \sigma(V_1; y. \text{let } x = M_1 \text{ in } M_2) \rrbracket[\overline{v^h} \mid v^k]; \end{aligned}$$

otherwise, if  $\sigma : T_i^{\text{par}} \rightsquigarrow T_i^{\text{ari}} / T_i^{\text{ini}} \Rightarrow A_i^{\text{fin}} \in \Sigma$  for some  $T_i^{\text{par}}$ ,  $T_i^{\text{ari}}$ ,  $T_i^{\text{ini}}$ , and  $A_i^{\text{fin}}$ , then

$$\begin{aligned} \llbracket M \rrbracket[\overline{v^h} \mid v^k] &= \llbracket \text{let } x = \sigma(V_1; y. M_1) \text{ in } M_2 \rrbracket[\overline{v^h} \mid v^k] \\ &= \llbracket \sigma(V_1; y. M_1) \rrbracket[\overline{v^h} \mid \lambda x. \llbracket M_2 \rrbracket[\overline{v^h} \mid v^k]] \\ &= v_i^h \llbracket V_1 \rrbracket (\lambda y. \llbracket M_1 \rrbracket[\overline{v^h} \mid \lambda x. \llbracket M_2 \rrbracket[\overline{v^h} \mid v^k]]) \\ &= v_i^h \llbracket V_1 \rrbracket (\lambda y. \llbracket \text{let } x = M_1 \text{ in } M_2 \rrbracket[\overline{v^h} \mid v^k]) \\ &= \llbracket \sigma(V_1; y. \text{let } x = M_1 \text{ in } M_2) \rrbracket[\overline{v^h} \mid v^k]. \end{aligned}$$

Note that here  $\sigma(V_1; y. \text{let } x = M_1 \text{ in } M_2)$  can be typed at the operation signature  $\Sigma$  by Lemma 5.

Case (HE\_HANDLEE): We are given

$$\frac{M_0 \longrightarrow M'_0}{\text{with } H \text{ handle } M_0 \longrightarrow \text{with } H \text{ handle } M'_0}$$

for some  $H$ ,  $M_0$ , and  $M'_0$  such that  $M = \text{with } H \text{ handle } M_0$  and  $M' = \text{with } H \text{ handle } M'_0$ . Let  $H = \{\text{return } x \mapsto M''_0\} \uplus \{\sigma_i(x_i; k_i) \mapsto M_i\}^{1 \leq i \leq n}$  for some  $x$ ,  $M''_0$ ,  $x_1, \dots, x_n$ ,  $k_1, \dots, k_n$ ,  $\sigma_1, \dots, \sigma_n$ ,  $M_1, \dots, M_n$ . Because  $\Gamma \vdash M : \Sigma \triangleright T / A^{\text{ini}} \Rightarrow A^{\text{fin}}$ , we have the following derivation for some  $T_1^{\text{par}}, \dots, T_n^{\text{par}}$ ,  $T_1^{\text{ari}}, \dots, T_n^{\text{ari}}$ ,  $C_1^{\text{ini}}, \dots, C_n^{\text{ini}}$ ,  $C_1^{\text{fin}}, \dots, C_n^{\text{fin}}$ ,  $\Sigma_0$ ,  $T_0$ ,  $C_0^{\text{ini}}$ , and  $C_0^{\text{fin}}$ :

$$\frac{\begin{array}{c} \Sigma_0 = \{\sigma_i : T_i^{\text{par}} \rightsquigarrow T_i^{\text{ari}} / C_i^{\text{ini}} \Rightarrow C_i^{\text{fin}}\}^{1 \leq i \leq n} \quad C_0^{\text{fin}} = \Sigma \triangleright T / A^{\text{ini}} \Rightarrow A^{\text{fin}} \\ \Gamma \vdash M_0 : \Sigma_0 \triangleright T_0 / C_0^{\text{ini}} \Rightarrow C_0^{\text{fin}} \\ \Gamma, x : T_0 \vdash M''_0 : C_0^{\text{ini}} \quad \forall i \in [1, n]. \Gamma, x_i : T_i^{\text{par}}, k_i : T_i^{\text{ari}} \rightarrow C_i^{\text{ini}} \vdash M_i : C_i^{\text{fin}} \end{array}}{\Gamma \vdash \text{with } H \text{ handle } M_0 : \Sigma \triangleright T / A^{\text{ini}} \Rightarrow A^{\text{fin}}} \quad (\text{HT\_HANDLE})$$

Therefore, we can apply the IH on  $M_0$ . By case analysis on its result. In what follows, let  $v_i = \lambda x_i. k_i. \text{return } \llbracket M_i \rrbracket$  for any  $i \in [1, n]$ .

Case  $\forall \overline{v}_0^h, v_0^k. |\overline{v}_0^h| = |\Sigma_0| \implies \exists \sigma, V_0, y, M_0''' . M_0' \longrightarrow^* \sigma(V_0; y. M_0''') \wedge \llbracket M_0 \rrbracket[\overline{v}_0^h | v_0^k] = \llbracket \sigma(V_0; y. M_0''') \rrbracket[\overline{v}_0^h | v_0^k]$ :  
 By the IH,

- $M_0' \longrightarrow^* \sigma(V_0; y. M_0''')$  and
- $\llbracket M_0 \rrbracket[v_1, \dots, v_n | \lambda x. \text{return} \llbracket M_0'' \rrbracket] = \llbracket \sigma(V_0; y. M_0''') \rrbracket[v_1, \dots, v_n | \lambda x. \text{return} \llbracket M_0'' \rrbracket]$

for some  $\sigma, V_0, y$ , and  $M_0'''$ . By (HE\_HANDLEE),

$$M' = \text{with } H \text{ handle } M_0' \longrightarrow^* \text{with } H \text{ handle } \sigma(V_0; y. M_0''') .$$

By Lemma 5 and the inversion of the typing derivation,  $\sigma = \sigma_i$  for some  $i$ . By (HE\_HANDLEOP),

$$M' \longrightarrow^* \text{with } H \text{ handle } \sigma(V_0; y. M_0''') \longrightarrow M_i[V_0/x_i][\lambda y. \text{with } H \text{ handle } M_0'''/k_i] .$$

Then, the conclusion is shown as follows (here we choose the second disjunct of the conclusion):

$$\begin{aligned} \llbracket M \rrbracket[\overline{v}^h | v^k] &= \llbracket \text{with } H \text{ handle } M_0 \rrbracket[\overline{v}^h | v^k] \\ &= \llbracket M_0 \rrbracket[v_1, \dots, v_n | \lambda x. \text{return} \llbracket M_0'' \rrbracket] \overline{v}^h v^k \\ &= \llbracket \sigma(V_0; y. M_0''') \rrbracket[v_1, \dots, v_n | \lambda x. \text{return} \llbracket M_0'' \rrbracket] \overline{v}^h v^k && \text{(by the IH)} \\ &= v_i \llbracket V_0 \rrbracket(\lambda y, \overline{h}, k. \llbracket M_0'' \rrbracket[v_1, \dots, v_n | \lambda x. \text{return} \llbracket M_0'' \rrbracket] \overline{h} k) \overline{v}^h v^k \\ &= v_i \llbracket V_0 \rrbracket(\lambda y, \overline{h}, k. \llbracket \text{with } H \text{ handle } M_0''' \rrbracket[\overline{h} | k]) \overline{v}^h v^k \\ &= v_i \llbracket V_0 \rrbracket[\lambda y. \text{with } H \text{ handle } M_0''' \rrbracket \overline{v}^h v^k \\ &\longrightarrow^+ \text{return} \llbracket M_i \rrbracket[\llbracket V_0 \rrbracket/x_i][\llbracket \lambda y. \text{with } H \text{ handle } M_0'''/k_i \rrbracket \overline{v}^h v^k] \\ &= (\lambda \overline{h}, k. \llbracket M_i[V_0/x_i][\lambda y. \text{with } H \text{ handle } M_0'''/k_i] \rrbracket[\overline{h} | k]) \overline{v}^h v^k && \text{by Lemma 12} \\ &\longrightarrow^+ \llbracket M_i[V_0/x_i][\lambda y. \text{with } H \text{ handle } M_0'''/k_i] \rrbracket[\overline{v}^h | v^k] && \text{by Lemma 13 .} \end{aligned}$$

Note the following points.

- The term  $\sigma(V_0; y. M_0''')$  can be typed at the operation signature  $\Sigma_0$  by Lemma 5, and  $\Sigma_0$  assigns to  $\sigma$  the type  $T_i^{\text{par}} \rightarrow T_i^{\text{ari}} / C_i^{\text{ini}} \Rightarrow C_i^{\text{fin}}$ ; thus,  $\llbracket \sigma(V_0; y. M_0''') \rrbracket[v_1, \dots, v_n | \lambda x. \text{return} \llbracket M_0'' \rrbracket]$  involves the term

$$\lambda y, \overline{h}, k. \llbracket M_0'' \rrbracket[v_1, \dots, v_n | \lambda x. \text{return} \llbracket M_0'' \rrbracket] \overline{h} k$$

in the eta-expanded form.

- Because  $\Gamma \vdash \sigma(V_0; y. M_0''') : \Sigma_0 \triangleright T_0 / C_0^{\text{ini}} \Rightarrow C_0^{\text{fin}}$  by Lemma 5, its inversion implies  $C_i^{\text{fin}} = C_0^{\text{fin}} = \Sigma \triangleright T / A^{\text{ini}} \Rightarrow A^{\text{fin}}$ . Because  $\Gamma, x_i : T_i^{\text{par}}, k_i : T_i^{\text{ari}} \rightarrow C_i^{\text{ini}} \vdash M_i : C_i^{\text{fin}}$ ,  $\llbracket M_i \rrbracket = \lambda \overline{h}, k. \llbracket M_i \rrbracket[\overline{h} | k]$  can take  $\overline{v}^h$ .

Case  $\forall \overline{v}_0^h, v_0^k. |\overline{v}_0^h| = |\Sigma_0| \implies \exists M_0''' . M_0' \longrightarrow^* M_0''' \wedge \llbracket M_0 \rrbracket[\overline{v}_0^h | v_0^k] \longrightarrow^+ \llbracket M_0''' \rrbracket[\overline{v}_0^h | v_0^k]$ : By the IH,

- $M_0' \longrightarrow^* M_0'''$  and
- $\llbracket M_0 \rrbracket[v_1, \dots, v_n | \lambda x. \text{return} \llbracket M_0'' \rrbracket] \longrightarrow^+ \llbracket M_0''' \rrbracket[v_1, \dots, v_n | \lambda x. \text{return} \llbracket M_0'' \rrbracket]$

for some  $M_0'''$ . By (HE\_HANDLEE),

$$M' = \text{with } H \text{ handle } M_0' \longrightarrow^* \text{with } H \text{ handle } M_0''' .$$

Therefore, the conclusion is shown as follows (here we choose the second disjunct of the conclusion and take with  $H$  handle  $M_0'''$  as  $M''$ ):

$$\begin{aligned} \llbracket M \rrbracket[\overline{v}^h | v^k] &= \llbracket \text{with } H \text{ handle } M_0 \rrbracket[\overline{v}^h | v^k] \\ &= \llbracket M_0 \rrbracket[v_1, \dots, v_n | \lambda x. \text{return} \llbracket M_0'' \rrbracket] \overline{v}^h v^k \\ &\longrightarrow^+ \llbracket M_0''' \rrbracket[v_1, \dots, v_n | \lambda x. \text{return} \llbracket M_0'' \rrbracket] \overline{v}^h v^k && \text{(by the IH)} \\ &= \llbracket \text{with } H \text{ handle } M_0''' \rrbracket[\overline{v}^h | v^k] . \end{aligned}$$

Case (HE\_HANDLEV): We are given

$$\text{with } H \text{ handle return } V \longrightarrow M_0[V/x]$$

for some  $H, V, M_0$ , and  $x$  such that  $\text{return } x \mapsto M_0 \in H$  and  $M = \text{with } H \text{ handle return } V$  and  $M' = M_0[V/x]$ . Without loss of generality, we can assume that  $x \notin \text{fv}(\overline{v^h}) \cup \text{fv}(v^k)$ . Let  $H = \{\text{return } x \mapsto M_0\} \uplus \{\sigma_i(x_i; k_i) \mapsto M_i\}_{1 \leq i \leq n}$  for some  $x_1, \dots, x_n, k_1, \dots, k_n, \sigma_1, \dots, \sigma_n, M_1, \dots, M_n$ . Furthermore, let  $v_i = \lambda x_i, k_i. \text{return } \llbracket M_i \rrbracket$  for any  $i \in [1, n]$ . Because  $\Gamma \vdash M : \Sigma \triangleright T / A^{\text{ini}} \Rightarrow A^{\text{fin}}$ , we have the following derivation for some  $T_1^{\text{par}}, \dots, T_n^{\text{par}}, T_1^{\text{ari}}, \dots, T_n^{\text{ari}}, C_1^{\text{ini}}, \dots, C_n^{\text{ini}}, C_1^{\text{fin}}, \dots, C_n^{\text{fin}}, \Sigma_0, T_0, C_0^{\text{ini}}$ , and  $C_0^{\text{fin}}$ :

$$\frac{\begin{array}{c} \Sigma_0 = \{\sigma_i : T_i^{\text{par}} \rightsquigarrow T_i^{\text{ari}} / C_i^{\text{ini}} \Rightarrow C_i^{\text{fin}}\}_{1 \leq i \leq n} \quad C_0^{\text{fin}} = \Sigma \triangleright T / A^{\text{ini}} \Rightarrow A^{\text{fin}} \\ \Gamma \vdash \text{return } V : \Sigma_0 \triangleright T_0 / C_0^{\text{ini}} \Rightarrow C_0^{\text{fin}} \\ \Gamma, x : T_0 \vdash M_0 : C_0^{\text{ini}} \quad \forall i \in [1, n]. \Gamma, x_i : T_i^{\text{par}}, k_i : T_i^{\text{ari}} \rightarrow C_i^{\text{ini}} \vdash M_i : C_i^{\text{fin}} \end{array}}{\Gamma \vdash \text{with } H \text{ handle return } V : \Sigma \triangleright T / A^{\text{ini}} \Rightarrow A^{\text{fin}}} \text{ (HT\_HANDLE)}$$

By inversion of  $\Gamma \vdash \text{return } V : \Sigma_0 \triangleright T_0 / C_0^{\text{ini}} \Rightarrow C_0^{\text{fin}}$ , we have  $C_0^{\text{ini}} = C_0^{\text{fin}}$ , that is,  $C_0^{\text{ini}} = \Sigma \triangleright T / A^{\text{ini}} \Rightarrow A^{\text{fin}}$ . Because  $\Gamma, x : T_0 \vdash M_0 : C_0^{\text{ini}}$ , we can find that  $\llbracket M_0 \rrbracket$  can take  $\overline{v^h}$ . Then, the conclusion is shown as follows (here we choose the second disjunct of the conclusion and take  $M' = M_0[V/x]$  as  $M''$ ):

$$\begin{aligned} \llbracket M \rrbracket[\overline{v^h} \mid v^k] &= \llbracket \text{with } H \text{ handle return } V \rrbracket[\overline{v^h} \mid v^k] \\ &= \llbracket \text{return } V \rrbracket[v_1, \dots, v_n \mid \lambda x. \text{return } \llbracket M_0 \rrbracket] \overline{v^h} v^k \\ &= (\lambda x. \text{return } \llbracket M_0 \rrbracket) \llbracket V \rrbracket \overline{v^h} v^k \\ &= (\lambda x, \overline{h}, k. \llbracket M_0 \rrbracket[\overline{h} \mid k]) \llbracket V \rrbracket \overline{v^h} v^k \\ &\rightarrow^+ \llbracket M_0 \rrbracket[\overline{h} \mid k] \llbracket \llbracket V \rrbracket / x \rrbracket[\overline{v^h} / \overline{h}] [v^k / k] \\ &= \llbracket M_0[V/x] \rrbracket[\overline{v^h} \mid v^k] \end{aligned} \quad \text{by Lemmas 12 and 13 .}$$

Case (HE\_HANDLEOP): We are given

$$\text{with } H \text{ handle } \sigma(V; y. M'_0) \rightarrow M''_0[V/x''][\lambda y. \text{with } H \text{ handle } M'_0/k'']$$

for some  $H, V, y, M'_0, M''_0, x'',$  and  $k''$  such that  $\sigma(x''; k'') \mapsto M''_0 \in H$  and  $M = \text{with } H \text{ handle } \sigma(V; y. M'_0)$  and  $M' = M''_0[V/x''][\lambda y. \text{with } H \text{ handle } M'_0/k'']$ . Without loss of generality, we can assume that  $x'', k'' \notin \text{fv}(\overline{v^h}) \cup \text{fv}(v^k)$ . Let  $H = \{\text{return } x \mapsto M_0\} \uplus \{\sigma_i(x_i; k_i) \mapsto M_i\}_{1 \leq i \leq n}$  for some  $x, M_0, x_1, \dots, x_n, k_1, \dots, k_n, \sigma_1, \dots, \sigma_n, M_1, \dots, M_n$ . We have some  $j > 0$  such that  $\sigma = \sigma_j, x'' = x_j, k'' = k_j$ , and  $M''_0 = M_j$ . Furthermore, let  $v_i = \lambda x_i, k_i. \text{return } \llbracket M_i \rrbracket$  for any  $i \in [1, n]$ . Because  $\Gamma \vdash M : \Sigma \triangleright T / A^{\text{ini}} \Rightarrow A^{\text{fin}}$ , we have the following derivation for some  $T_1^{\text{par}}, \dots, T_n^{\text{par}}, T_1^{\text{ari}}, \dots, T_n^{\text{ari}}, C_1^{\text{ini}}, \dots, C_n^{\text{ini}}, C_1^{\text{fin}}, \dots, C_n^{\text{fin}}, \Sigma_0, T_0, C_0^{\text{ini}}$ , and  $C_0^{\text{fin}}$ :

$$\frac{\begin{array}{c} \Sigma_0 = \{\sigma_i : T_i^{\text{par}} \rightsquigarrow T_i^{\text{ari}} / C_i^{\text{ini}} \Rightarrow C_i^{\text{fin}}\}_{1 \leq i \leq n} \quad C_0^{\text{fin}} = \Sigma \triangleright T / A^{\text{ini}} \Rightarrow A^{\text{fin}} \\ \Gamma \vdash \sigma(V; y. M'_0) : \Sigma_0 \triangleright T_0 / C_0^{\text{ini}} \Rightarrow C_0^{\text{fin}} \\ \Gamma, x : T_0 \vdash M_0 : C_0^{\text{ini}} \quad \forall i \in [1, n]. \Gamma, x_i : T_i^{\text{par}}, k_i : T_i^{\text{ari}} \rightarrow C_i^{\text{ini}} \vdash M_i : C_i^{\text{fin}} \end{array}}{\Gamma \vdash \text{with } H \text{ handle } \sigma(V; y. M'_0) : \Sigma \triangleright T / A^{\text{ini}} \Rightarrow A^{\text{fin}}} \text{ (HT\_HANDLE)}$$

By inversion of  $\Gamma \vdash \sigma(V; y. M'_0) : \Sigma_0 \triangleright T_0 / C_0^{\text{ini}} \Rightarrow C_0^{\text{fin}}$  and  $\sigma = \sigma_j$ , we have  $C_0^{\text{fin}} = C_j^{\text{fin}}$ , that is,  $C_j^{\text{fin}} = \Sigma \triangleright T / A^{\text{ini}} \Rightarrow A^{\text{fin}}$ . Because  $\Gamma, x_j : T_j^{\text{par}}, k_j : T_j^{\text{ari}} \rightarrow C_j^{\text{ini}} \vdash M_j : C_j^{\text{fin}}$ , we can find that  $\llbracket M_j \rrbracket$  can take  $\overline{v^h}$ . Then, the conclusion is shown as follows (here we choose the second disjunct of the conclusion and take  $M' = M_j[V/x_j][\lambda y. \text{with } H \text{ handle } M'_0/k_j]$  as  $M''$ ):

$$\begin{aligned} \llbracket M \rrbracket[\overline{v^h} \mid v^k] &= \llbracket \text{with } H \text{ handle } \sigma(V; y. M'_0) \rrbracket[\overline{v^h} \mid v^k] \\ &= \llbracket \sigma_j(V; y. M'_0) \rrbracket[v_1, \dots, v_n \mid \lambda x. \text{return } \llbracket M_0 \rrbracket] \overline{v^h} v^k \\ &= v_j \llbracket V \rrbracket(\lambda y, \overline{h_0}, k_0. \llbracket M'_0 \rrbracket[v_1, \dots, v_n \mid \lambda x. \text{return } \llbracket M_0 \rrbracket] \overline{h_0} k_0) \overline{v^h} v^k \\ &= v_j \llbracket V \rrbracket(\lambda y, \overline{h_0}, k_0. \llbracket \text{with } H \text{ handle } M'_0 \rrbracket[\overline{h_0} \mid k_0]) \overline{v^h} v^k \\ &= v_j \llbracket V \rrbracket \llbracket \lambda y. \text{with } H \text{ handle } M'_0 \rrbracket \overline{v^h} v^k \\ &= (\lambda x_j, k_j, \overline{h}, k. \llbracket M_j \rrbracket[\overline{h} \mid k]) \llbracket V \rrbracket \llbracket \lambda y. \text{with } H \text{ handle } M'_0 \rrbracket \overline{v^h} v^k \\ &\rightarrow^+ \llbracket M_j \rrbracket[\overline{h} \mid k] \llbracket \llbracket V \rrbracket / x_j \rrbracket \llbracket \llbracket \lambda y. \text{with } H \text{ handle } M'_0 \rrbracket / k_j \rrbracket [\overline{v^h} / \overline{h}] [v^k / k] \\ &= \llbracket M_j[V/x_j][\lambda y. \text{with } H \text{ handle } M'_0/k_j] \rrbracket[\overline{v^h} \mid v^k] \quad \text{(by Lemmas 12 and 13) .} \end{aligned}$$

Note that the term  $\sigma(V; y. M'_0)$  is typed at the operation signature  $\Sigma_0$ , which assigns to  $\sigma_j$  the type  $T_j^{\text{par}} \rightarrow T_j^{\text{ari}} / C_j^{\text{ini}} \Rightarrow C_j^{\text{fin}}$ . Thus,  $\llbracket \sigma_i(V; y. M'_0) \rrbracket [v_1, \dots, v_n \mid \lambda x. \text{return} \llbracket M_0 \rrbracket]$  involves the term

$$\lambda y. \overline{h_0}, k_0. \llbracket M'_0 \rrbracket [v_1, \dots, v_n \mid \lambda x. \text{return} \llbracket M_0 \rrbracket] \overline{h_0} k_0$$

in the eta-expanded form. □

**Lemma 15** (Evaluation in  $\text{HEPCF}^{\text{ATM}}$  is Deterministic). *If  $M \rightarrow M_1$  and  $M \rightarrow M_2$ , then  $M_1 = M_2$ .* □

*Proof.* Straightforward by induction on the derivation of  $M \rightarrow M_1$ . □

**Lemma 16** (Well-Definedness of  $\text{HEPCF}^{\text{ATM}}$  Effect Trees). *If  $\emptyset \vdash M : \Sigma \triangleright T / A^{\text{ini}} \Rightarrow A^{\text{fin}}$  and  $\Sigma$  is top-level, then  $\mathbf{ET}(M)$  is well defined and uniquely determined, and it is in  $\mathbf{Tree}_{S_{\overline{\Sigma}}}$ .*

*Proof.* We show that  $\mathbf{ET}(M) \in \mathbf{Tree}_{S_{\overline{\Sigma}}}$  by coinduction. We proceed by case analysis on the evaluation of  $M$ .

Case  $M \rightarrow^\omega$ : Obvious.

Case  $\exists V. M \rightarrow^* \text{return } V$ : By the definition,  $\mathbf{ET}(M) = \text{return } V$ . By Lemma 5,  $\emptyset \vdash \text{return } V : \Sigma \triangleright T / A^{\text{ini}} \Rightarrow A^{\text{fin}}$ . By its inversion,  $\emptyset \vdash V : T$ . Thus,  $\text{return } V \in \mathbf{Tree}_{S_{\overline{\Sigma}}}$ .

Case  $\exists \sigma, V, x, M'. M \rightarrow^* \sigma(V; x. M')$ : By Lemma 5,  $\emptyset \vdash \sigma(V; x. M') : \Sigma \triangleright T / A^{\text{ini}} \Rightarrow A^{\text{fin}}$ . By its inversion and Lemma 3,

- $\sigma : B \rightsquigarrow \mathfrak{n} / T' \Rightarrow T' \in \Sigma$ ,
- $V = c$ , and
- $x : \mathfrak{n} \vdash M' : \Sigma \triangleright T / A^{\text{ini}} \Rightarrow T'$

for some  $B, n, T'$ , and  $c$  (note that  $\Sigma$  is top-level). Then, by the definition,

$$\mathbf{ET}(M) = \sigma(c, \mathbf{ET}(M'[\underline{1}/x]), \dots, \mathbf{ET}(M'[\underline{n}/x])) .$$

Thus, by the coinduction principle, it suffices to show that, for any  $i \in [1, n]$ ,  $\emptyset \vdash M'[\underline{i}/x] : \Sigma \triangleright T / A^{\text{ini}} \Rightarrow T'$ , which is shown by Lemma 2 with  $x : \mathfrak{n} \vdash M' : \Sigma \triangleright T / A^{\text{ini}} \Rightarrow T'$  and  $\emptyset \vdash \underline{i} : \mathfrak{n}$ .

Otherwise: Contradictory with Lemmas 5 and 4.

The uniqueness of  $\mathbf{ET}(M)$  is shown by Lemma 15. □

**Lemma 17** (Evaluation in EPCF is Deterministic). *If  $e \rightarrow e_1$  and  $e \rightarrow e_2$ , then  $e_1 = e_2$ .*

*Proof.* Straightforward by induction on the derivation of  $e \rightarrow e_1$ . □

**Lemma 18** (Well-Definedness of EPCF Effect Trees). *If  $\Xi \parallel \emptyset \vdash e : \tau$ , then  $\mathbf{ET}(e)$  is well defined and uniquely determined, and it is in  $\mathbf{Tree}_{S_{\overline{\Xi}}}$ .*

*Proof.* We show that  $\mathbf{ET}(e) \in \mathbf{Tree}_{S_{\overline{\Xi}}}$  by coinduction. We proceed by case analysis on the evaluation of  $e$ .

Case  $e \rightarrow^\omega$ : Obvious.

Case  $\exists v. e \rightarrow^* \text{return } v$ : By the definition,  $\mathbf{ET}(e) = \text{return } v$ . By Lemma 10,  $\Xi \parallel \emptyset \vdash \text{return } v : \tau$ . By its inversion,  $\Xi \parallel \emptyset \vdash v : \tau$ . Thus,  $\text{return } v \in \mathbf{Tree}_{S_{\overline{\Xi}}}$ .

Case  $\exists \sigma, v, x, e'. e \rightarrow^* \sigma(v; x. e')$ : By Lemma 10,  $\Xi \parallel \emptyset \vdash \sigma(v; x. e') : \tau$ . By its inversion and Lemma 8,

- $\sigma : B \rightsquigarrow \mathfrak{n} \in \Xi$ ,
- $v = c$ , and
- $\Xi \parallel x : \mathfrak{n} \vdash e' : \tau$

for some  $B$ ,  $n$ , and  $c$ . Then, by the definition,  $\mathbf{ET}(e) = \sigma(c, \mathbf{ET}(e'[\underline{1}/x]), \dots, \mathbf{ET}(e'[\underline{n}/x]))$ . Thus, by the coinduction principle, it suffices to show that, for any  $i \in [1, n]$ ,  $\Xi \parallel \emptyset \vdash e'[\underline{i}/x] : \tau$ , which is shown by Lemma 7 with  $\Xi \parallel x : n \vdash e' : \tau$  and  $\Xi \parallel \emptyset \vdash i : n$ .

Otherwise: Contradictory with Lemmas 10 and 9.

The uniqueness of  $\mathbf{ET}(e)$  is shown by Lemma 17.  $\square$

**Lemma 19** (Evaluation Preserves Effect Trees in EPCF). *If  $\Xi \parallel \emptyset \vdash e : \tau$  and  $e \longrightarrow^* e'$ , then  $\mathbf{ET}(e) = \mathbf{ET}(e')$ .*

*Proof.* By Lemmas 10 and 18,  $\mathbf{ET}(e), \mathbf{ET}(e') \in \mathbf{Tree}_{S_{\Xi}^{\Xi}}$ . We show that  $\mathbf{ET}(e) = \mathbf{ET}(e')$  by case analysis on the evaluation of  $e$ .

Case  $e \longrightarrow^{\omega}$ : By Lemma 17,  $e' \longrightarrow^{\omega}$ . Therefore,  $\mathbf{ET}(e) = \mathbf{ET}(e') = \perp$ .

Case  $\exists v. e \longrightarrow^* \text{return } v$ : By Lemma 17,  $e' \longrightarrow^* \text{return } v$ . Therefore,  $\mathbf{ET}(e) = \mathbf{ET}(e') = \text{return } v$ .

Case  $\exists \sigma, v, x, e_0. e \longrightarrow^* \sigma(v; x. e_0)$ : Because  $\mathbf{ET}(e)$  is well defined, we have  $\sigma : B \rightsquigarrow n \in \Xi$  and  $v = c$  for some  $B$ ,  $\underline{n}$ , and  $c$ . By Lemma 17,  $e' \longrightarrow^* \sigma(c; x. e_0)$ . Therefore,  $\mathbf{ET}(e) = \mathbf{ET}(e') = \sigma(c, \mathbf{ET}(e_0[\underline{1}/x]), \dots, \mathbf{ET}(e_0[\underline{n}/x]))$ .

Otherwise: Contradictory with Lemmas 10 and 9.  $\square$

**Lemma 20** (Correspondence between Effect Trees of CPS-Transformed Terms and CPS-Transformed Effect Trees).

*Let  $\Sigma = \{\sigma_i : B_i \rightsquigarrow E_i / T_i \Rightarrow T_i\}^{1 \leq i \leq n}$  and  $\Xi = \{\sigma_i : B_i \rightsquigarrow E_i\}^{1 \leq i \leq n}$ . Assume that  $\emptyset \vdash M : \Sigma \triangleright T / A^{\text{ini}} \Rightarrow A^{\text{fin}}$  and  $\sigma_1, \dots, \sigma_n$  are ordered. Let  $v^{\text{h}} = v_1^{\text{h}}, \dots, v_n^{\text{h}}$  such that, for any  $i \in [1, n]$ ,  $v_i^{\text{h}} = \lambda x, k. \sigma_i(x; y. k y)$  for some distinct variables  $x, k$ , and  $y$ . Also, let  $v^{\text{k}}$  be a value such that  $\Xi \parallel \emptyset \vdash v^{\text{k}} : \llbracket T \rrbracket \rightarrow \llbracket A^{\text{ini}} \rrbracket$ . Then,  $\mathbf{ET}(\llbracket M \rrbracket[v^{\text{h}} \mid v^{\text{k}}]) = \llbracket \mathbf{ET}(M) \rrbracket[v^{\text{k}}]$ .*

*Proof.* First, we show that  $\llbracket \mathbf{ET}(M) \rrbracket[v^{\text{k}}]$  is well defined and is in  $\mathbf{Tree}_{S_{\llbracket A^{\text{fin}} \rrbracket}^{\Xi}}$  by coinduction. By Lemma 16 with  $\emptyset \vdash M : \Sigma \triangleright T / A^{\text{ini}} \Rightarrow A^{\text{fin}}$ , we can find that  $\mathbf{ET}(M) \in \mathbf{Tree}_{S_T^{\Sigma}}$ . We proceed by case analysis on  $\mathbf{ET}(M)$ .

Case  $\mathbf{ET}(M) = \perp$ : Obvious because  $\llbracket \mathbf{ET}(M) \rrbracket[v^{\text{k}}] = \llbracket \perp \rrbracket[v^{\text{k}}] = \perp$ .

Case  $\exists V. \mathbf{ET}(M) = \text{return } V$ : Because  $\llbracket \mathbf{ET}(M) \rrbracket[v^{\text{k}}] = \llbracket \text{return } V \rrbracket[v^{\text{k}}] = \mathbf{ET}(v^{\text{k}} \llbracket V \rrbracket)$ , it suffices to show that

$$\mathbf{ET}(v^{\text{k}} \llbracket V \rrbracket) \in \mathbf{Tree}_{S_{\llbracket A^{\text{fin}} \rrbracket}^{\Xi}}.$$

Because  $\mathbf{ET}(M) = \text{return } V$ , we have  $M \longrightarrow^* \text{return } V$ . By Lemma 5,  $\emptyset \vdash \text{return } V : \Sigma \triangleright T / A^{\text{ini}} \Rightarrow A^{\text{fin}}$ . By its inversion,  $\emptyset \vdash V : T$  and  $A^{\text{ini}} = A^{\text{fin}}$ . By Lemma 11,  $\Xi \parallel \emptyset \vdash \llbracket V \rrbracket : \llbracket T \rrbracket$ . Because  $\Xi \parallel \emptyset \vdash v^{\text{k}} : \llbracket T \rrbracket \rightarrow \llbracket A^{\text{ini}} \rrbracket$ , we have  $\Xi \parallel \emptyset \vdash v^{\text{k}} \llbracket V \rrbracket : \llbracket A^{\text{ini}} \rrbracket$  by (T\_APP). Thus, by Lemma 18,  $\mathbf{ET}(v^{\text{k}} \llbracket V \rrbracket) \in \mathbf{Tree}_{S_{\llbracket A^{\text{ini}} \rrbracket}^{\Xi}}$ . Because  $A^{\text{ini}} = A^{\text{fin}}$ , we have the conclusion.

Case  $\exists \sigma, c, M_1, \dots, M_m. \mathbf{ET}(M) = \sigma(c, \mathbf{ET}(M_1), \dots, \mathbf{ET}(M_m))$ : By the definition of  $\mathbf{ET}(M)$ , we have  $\sigma = \sigma_i$  for some  $i$  such that  $E_i = m$ . Because

$$\llbracket \mathbf{ET}(M) \rrbracket[v^{\text{k}}] = \llbracket \sigma_i(c, \mathbf{ET}(M_1), \dots, \mathbf{ET}(M_m)) \rrbracket[v^{\text{k}}] = \sigma_i(c, \llbracket \mathbf{ET}(M_1) \rrbracket[v^{\text{k}}], \dots, \llbracket \mathbf{ET}(M_m) \rrbracket[v^{\text{k}}]),$$

it suffices to show that, for any  $j \in [1, m]$ ,  $\llbracket \mathbf{ET}(M_j) \rrbracket[v^{\text{k}}] \in \mathbf{Tree}_{S_{\llbracket A^{\text{fin}} \rrbracket}^{\Xi}}$ . By the coinduction hypothesis, it suffices to show that, for any  $j \in [1, m]$ ,

$$\emptyset \vdash M_j : \Sigma \triangleright T / A^{\text{ini}} \Rightarrow A^{\text{fin}}.$$

Let  $j \in [1, m]$ . Because  $\mathbf{ET}(M) = \sigma_i(c, \mathbf{ET}(M_1), \dots, \mathbf{ET}(M_m))$  and  $\emptyset \vdash M : \Sigma \triangleright T / A^{\text{ini}} \Rightarrow A^{\text{fin}}$ , we have  $M \longrightarrow^* \sigma_i(c; x. M')$  for some  $x$  and  $M'$  such that  $M_j = M'[\underline{j}/x]$ . By Lemma 5,  $\emptyset \vdash \sigma_i(c; x. M') : \Sigma \triangleright T / A^{\text{ini}} \Rightarrow A^{\text{fin}}$ . By its inversion,  $x : m \vdash M' : \Sigma \triangleright T / A^{\text{ini}} \Rightarrow T_i$  and  $A^{\text{fin}} = T_i$ . Because  $\emptyset \vdash \underline{j} : m$  by (HT\_ECONST), we have  $\emptyset \vdash M'[\underline{j}/x] : \Sigma \triangleright T / A^{\text{ini}} \Rightarrow T_i$  by Lemma 2. Because  $A^{\text{fin}} = T_i$ , we have the conclusion.

Next, we show that  $\mathbf{ET}(\llbracket M \rrbracket[\overline{v^h} \mid v^k])$  is well defined and is in  $\mathbf{Tree}_{S_{[A^{\text{fin}}]}}^{\Xi}$ . We have  $\Xi \parallel \emptyset \vdash \overline{v^h} : \Sigma$  because we can derive  $\Xi \parallel \emptyset \vdash \lambda x, k. \sigma_i(x; y. k y) : B_i \rightarrow (E_i \rightarrow \llbracket T_i \rrbracket) \rightarrow \llbracket T_i \rrbracket$  for any  $i \in [1, n]$  as follows:

$$\frac{\frac{\Xi \ni \sigma_i : B_i \rightsquigarrow E_i \quad \Xi \parallel \Delta \vdash x : B_i \quad \frac{\frac{\Xi \parallel \Delta' \vdash k : E_i \rightarrow \llbracket T_i \rrbracket}{\Xi \parallel \Delta' \vdash k y : \llbracket T_i \rrbracket} \text{(T\_VAR)} \quad \frac{\Xi \parallel \Delta' \vdash y : E_i}{\Xi \parallel \Delta' \vdash k y : \llbracket T_i \rrbracket} \text{(T\_VAR)}}{\Xi \parallel \Delta' \vdash k y : \llbracket T_i \rrbracket} \text{(T\_APP)}}{\Xi \parallel \Delta \vdash \sigma_i(x; y. k y) : \llbracket T_i \rrbracket} \text{(T\_OP)}}{\Xi \parallel \emptyset \vdash \lambda x, k. \sigma_i(x; y. k y) : B_i \rightarrow (E_i \rightarrow \llbracket T_i \rrbracket) \rightarrow \llbracket T_i \rrbracket} \text{(T\_ABS), (T\_RETURN)}$$

where  $\Delta = x : B_i, k : E_i \rightarrow \llbracket T_i \rrbracket$  and  $\Delta' = \Delta, y : E_i$ . Note that  $\llbracket B \rrbracket = B$  and  $\llbracket E \rrbracket = E$  for any  $B$  and  $E$ . Thus, by Lemma 11,  $\Xi \parallel \emptyset \vdash \llbracket M \rrbracket[\overline{v^h} \mid v^k] : \llbracket A^{\text{fin}} \rrbracket$ . Therefore,  $\mathbf{ET}(\llbracket M \rrbracket[\overline{v^h} \mid v^k]) \in \mathbf{Tree}_{S_{[A^{\text{fin}}]}}^{\Xi}$  by Lemma 18.

Finally, we show that  $\mathbf{ET}(\llbracket M \rrbracket[\overline{v^h} \mid v^k]) = \llbracket \mathbf{ET}(M) \rrbracket[v^k]$  by coinduction. We proceed by case analysis on the evaluation of  $M$ .

Case  $M \rightarrow^\omega$ : By Lemmas 5, 15, and 14,  $\llbracket M \rrbracket[\overline{v^h} \mid v^k] \rightarrow^\omega$ . Therefore,  $\llbracket \mathbf{ET}(M) \rrbracket[v^k] = \mathbf{ET}(\llbracket M \rrbracket[\overline{v^h} \mid v^k]) = \perp$ .

Case  $\exists V. M \rightarrow^* \text{return } V$ : By Lemmas 5, 15 and 14,  $\llbracket M \rrbracket[\overline{v^h} \mid v^k] \rightarrow^* \llbracket \text{return } V \rrbracket[\overline{v^h} \mid v^k] = v^k \llbracket V \rrbracket$ . Because  $\Xi \parallel \emptyset \vdash \llbracket M \rrbracket[\overline{v^h} \mid v^k] : \llbracket A^{\text{fin}} \rrbracket$  as shown above, we have  $\mathbf{ET}(\llbracket M \rrbracket[\overline{v^h} \mid v^k]) = \mathbf{ET}(v^k \llbracket V \rrbracket)$  by Lemma 19. Because  $\llbracket \mathbf{ET}(M) \rrbracket[v^k] = \llbracket \text{return } V \rrbracket[v^k] = \mathbf{ET}(v^k \llbracket V \rrbracket)$ , we have the conclusion.

Case  $\exists \sigma, V, z, M'. M \rightarrow^* \sigma(V; z. M')$ : Because  $\mathbf{ET}(M) \in \mathbf{Tree}_{S_T^{\Xi}}$  by Lemma 16, we have  $V = c$  and  $\sigma = \sigma_i$  for some  $c$  and  $i$ . By Lemmas 5, 15, and 14,  $\emptyset \vdash \sigma_i(c; z. M') : \Sigma \triangleright T / A^{\text{ini}} \Rightarrow A^{\text{fin}}$  and  $\llbracket M \rrbracket[\overline{v^h} \mid v^k] \rightarrow^* \llbracket \sigma_i(c; z. M') \rrbracket[\overline{v^h} \mid v^k]$ . Thus,

$$\begin{aligned} \llbracket M \rrbracket[\overline{v^h} \mid v^k] &\rightarrow^* \llbracket \sigma_i(c; z. M') \rrbracket[\overline{v^h} \mid v^k] \\ &= v_i^h c \lambda z. \llbracket M' \rrbracket[\overline{v^h} \mid v^k] \quad (\text{note that } \sigma_i : B_i \rightsquigarrow E_i / T_i \Rightarrow T_i \in \Sigma) \\ &= (\lambda x, k. \sigma_i(x; y. k y)) c \lambda z. \llbracket M' \rrbracket[\overline{v^h} \mid v^k] \\ &\rightarrow^* \sigma_i(c; y. (\lambda z. \llbracket M' \rrbracket[\overline{v^h} \mid v^k]) y) . \end{aligned}$$

Let  $E_i = \mathbf{m}$  for some  $m$ . Then,

$$\begin{aligned} \mathbf{ET}(\llbracket M \rrbracket[\overline{v^h} \mid v^k]) &= \mathbf{ET}(\sigma_i(c; y. (\lambda z. \llbracket M' \rrbracket[\overline{v^h} \mid v^k]) y)) \quad (\text{by Lemma 19 with } \Xi \parallel \emptyset \vdash \llbracket M \rrbracket[\overline{v^h} \mid v^k] : \llbracket A^{\text{fin}} \rrbracket) \\ &= \sigma_i(c, \mathbf{ET}((\lambda z. \llbracket M' \rrbracket[\overline{v^h} \mid v^k]) \mathbf{1}), \dots, \mathbf{ET}((\lambda z. \llbracket M' \rrbracket[\overline{v^h} \mid v^k]) \mathbf{m})) \\ &= \sigma_i(c, \mathbf{ET}(\llbracket M' \rrbracket[\overline{v^h} \mid v^k][\mathbf{1}/z]), \dots, \mathbf{ET}(\llbracket M' \rrbracket[\overline{v^h} \mid v^k][\mathbf{m}/z])) \quad (\text{by Lemma 19}) \\ &= \sigma_i(c, \mathbf{ET}(\llbracket M' \rrbracket[\mathbf{1}/z][\overline{v^h} \mid v^k]), \dots, \mathbf{ET}(\llbracket M' \rrbracket[\mathbf{m}/z][\overline{v^h} \mid v^k])) \quad (\text{by Lemma 12}) \end{aligned}$$

(note that, for any  $j \in [1, m]$ ,  $(\lambda z. \llbracket M' \rrbracket[\overline{v^h} \mid v^k]) j$  is well typed by Lemmas 10 and 7). On the other hand,

$$\begin{aligned} \llbracket \mathbf{ET}(M) \rrbracket[v^k] &= \llbracket \sigma_i(c, \mathbf{ET}(M'[\mathbf{1}/z]), \dots, \mathbf{ET}(M'[\mathbf{m}/z])) \rrbracket[v^k] \\ &= \sigma_i(c, \llbracket \mathbf{ET}(M'[\mathbf{1}/z]) \rrbracket[v^k], \dots, \llbracket \mathbf{ET}(M'[\mathbf{m}/z]) \rrbracket[v^k]) . \end{aligned}$$

Let  $j \in [1, m]$ . Now, it suffices to show that

$$\mathbf{ET}(\llbracket M' [j/z] \rrbracket[\overline{v^h} \mid v^k]) = \mathbf{ET}(M' [j/z]) .$$

By the coinduction principle, it suffices to show that

$$\emptyset \vdash M' [j/z] : \Sigma \triangleright T / A^{\text{ini}} \Rightarrow A^{\text{fin}} .$$

It is shown by the inversion of  $\emptyset \vdash \sigma_i(c; z. M') : \Sigma \triangleright T / A^{\text{ini}} \Rightarrow A^{\text{fin}}$  and Lemma 2 with  $\emptyset \vdash j : \mathbf{m}$ .

Otherwise: Contradictory with Lemmas 4 and 5.

□

**Theorem 1** (Preservation of Effect Trees). *Let  $\Sigma = \{\sigma_i : B_i \rightsquigarrow E_i / T_i \Rightarrow T_i\}^{1 \leq i \leq n}$  and  $T$  be a ground type. Assume that  $\emptyset \vdash M : \Sigma \triangleright T / T \Rightarrow A^{\text{fin}}$  and  $\sigma_1, \dots, \sigma_n$  are ordered. Let  $\overline{v^h} = v_1^h, \dots, v_n^h$  such that, for any  $i \in [1, n]$ ,  $v_i^h = \lambda x, k. \sigma_i(x; y. k y)$  for some distinct variables  $x, k$ , and  $y$ . Also, let  $v^k = \lambda x. \text{return } x$ . Then,  $\mathbf{ET}(\llbracket M \rrbracket[\overline{v^h} \mid v^k]) = \mathbf{ET}(M)$ .*

*Proof.* Let  $\Xi = \{\sigma_i : B_i \rightsquigarrow E_i\}^{1 \leq i \leq n}$ . By (T\_VAR), (T\_RETURN), and (T\_ABS), we have  $\Xi \parallel \emptyset \vdash v^k : \llbracket T \rrbracket \rightarrow \llbracket T \rrbracket$ . Thus, by Lemma 20,  $\mathbf{ET}(\llbracket M \rrbracket[\overline{v^h} \mid v^k]) = \llbracket \mathbf{ET}(M) \rrbracket[v^k]$ . Then, it suffices to show that

$$\llbracket \mathbf{ET}(M) \rrbracket[v^k] = \mathbf{ET}(M) .$$

We show it by coinduction. By case analysis on the evaluation of  $M$ .

Case  $M \rightarrow^{\omega}$ : Obvious because  $\llbracket \mathbf{ET}(M) \rrbracket[v^k] = \mathbf{ET}(M) = \perp$ .

Case  $\exists V. M \rightarrow^* \text{return } V$ : By the definition,  $\mathbf{ET}(M) = \text{return } V$  and  $\llbracket \mathbf{ET}(M) \rrbracket[v^k] = \llbracket \text{return } V \rrbracket[v^k] = \mathbf{ET}(v^k \llbracket V \rrbracket) = \text{return } \llbracket V \rrbracket$ . By Lemma 5 with  $\emptyset \vdash M : \Sigma \triangleright T / T \Rightarrow A^{\text{fin}}$ , we have  $\emptyset \vdash \text{return } V : \Sigma \triangleright T / T \Rightarrow A^{\text{fin}}$ . By its inversion,  $\emptyset \vdash V : T$ . Because  $T$  is ground,  $V = c$  for some  $c$ , or  $V = \underline{j}$  for some  $i$  by Lemma 3. In both cases,  $\llbracket V \rrbracket = V$ . Thus, we have the conclusion.

Case  $\exists \sigma, V, x, M'. M \rightarrow^* \sigma(V; x. M')$ : Because  $\mathbf{ET}(M) \in \mathbf{Tree}_{S_T^\Sigma}$  by Lemma 16, we have  $\sigma = \sigma_i$  and  $V = c$  for some  $i$  and  $c$ . Let  $E_i = \mathbf{m}$  for some  $m$ . By the definition,  $\mathbf{ET}(M) = \sigma_i(c, \mathbf{ET}(M'[\underline{1}/x]), \dots, \mathbf{ET}(M'[\mathbf{m}/x]))$  and  $\llbracket \mathbf{ET}(M) \rrbracket[v^k] = \sigma_i(c, \llbracket \mathbf{ET}(M'[\underline{1}/x]) \rrbracket[v^k], \dots, \llbracket \mathbf{ET}(M'[\mathbf{m}/x]) \rrbracket[v^k])$ . Let  $j \in [1, m]$ . It suffices to show that  $\mathbf{ET}(M'[\underline{j}/x]) = \llbracket \mathbf{ET}(M'[\underline{j}/x]) \rrbracket[v^k]$ . By the coinduction principle, it suffices show that

$$\emptyset \vdash M'[\underline{j}/x] : \Sigma \triangleright T / T \Rightarrow A^{\text{fin}} .$$

By Lemma 5 with  $\emptyset \vdash M : \Sigma \triangleright T / T \Rightarrow A^{\text{fin}}$  and  $M \rightarrow^* \sigma_i(c; x. M')$ , we have  $\emptyset \vdash \sigma_i(c; x. M') : \Sigma \triangleright T / T \Rightarrow A^{\text{fin}}$ . By its inversion,  $x : \mathbf{m} \vdash M' : \Sigma \triangleright T / T \Rightarrow A^{\text{fin}}$  (note that  $A^{\text{fin}} = T_i$ ). Because  $\emptyset \vdash \underline{j} : \mathbf{m}$  by (HT\_ECONST), we have the conclusion by Lemma 2.

Otherwise: Contradictory with Lemmas 5 and 4.

□
